# Supplementary figures and images for: RBM7 deficiency promotes breast cancer metastasis by coordinating MFGE8 splicing switch and NF-kB pathway
Source: eLife journal article supplement (doi:10.7554/elife.95318), 2024-02-23

Sup Figure2D

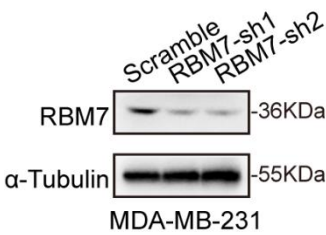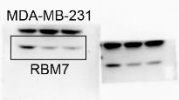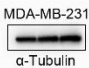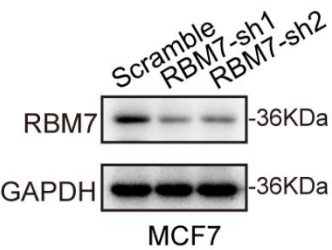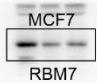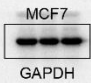

Supplement: fig2-figsupp1-data2 [file elife-95318-fig2-figsupp1-data2-v1.zip]

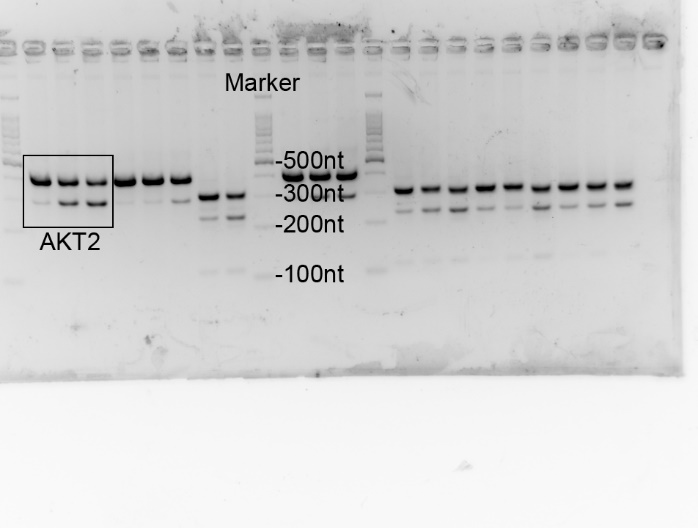

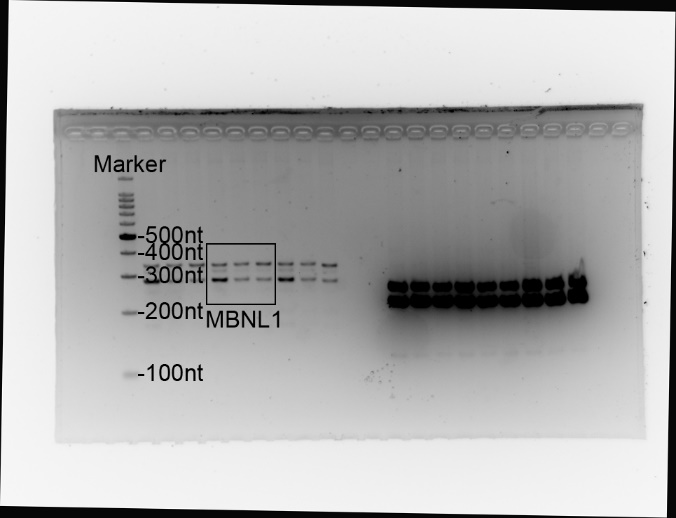

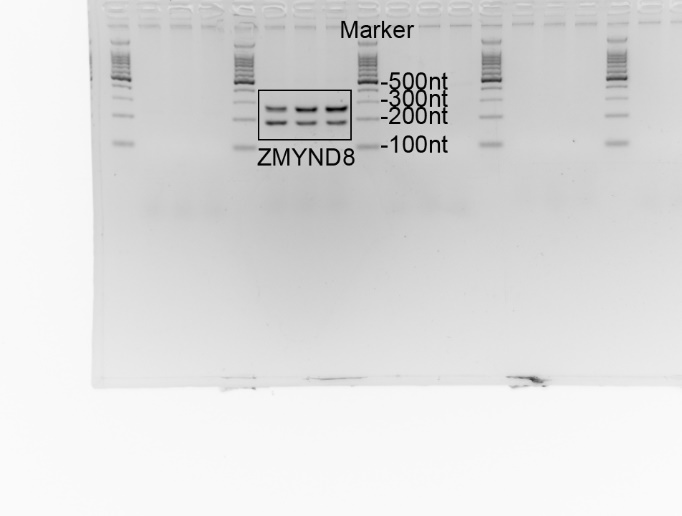

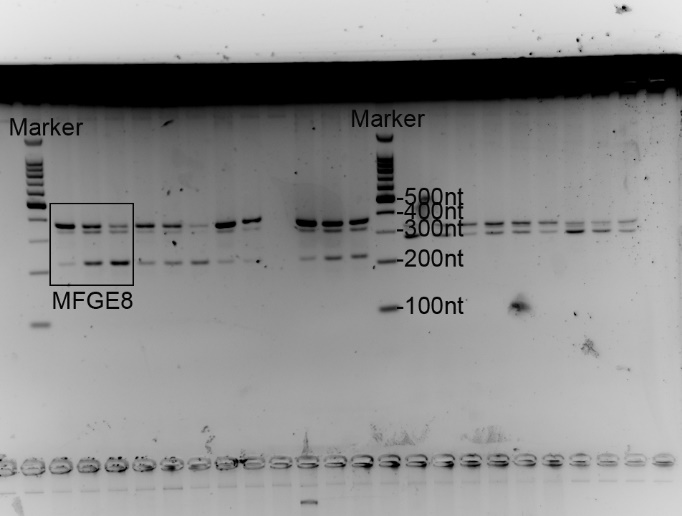
Figure 3F


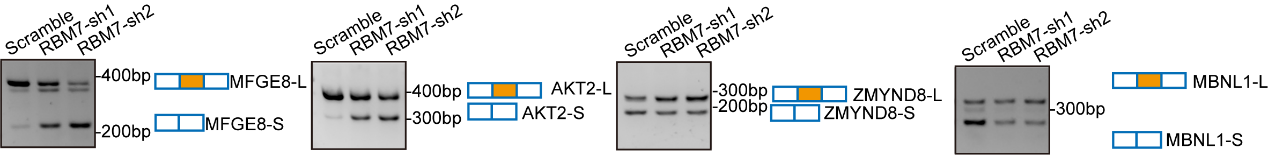

Supplement: fig4-data1 [file Figure 3F.docx]

Sup Figure2F

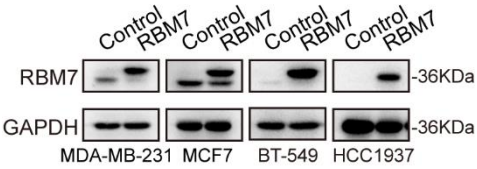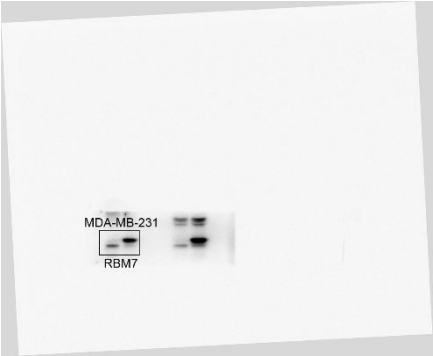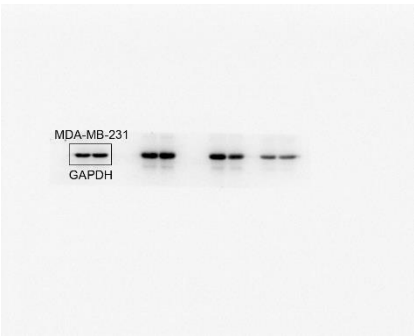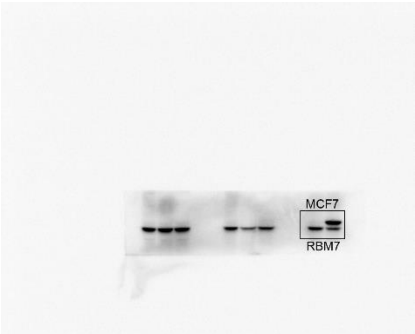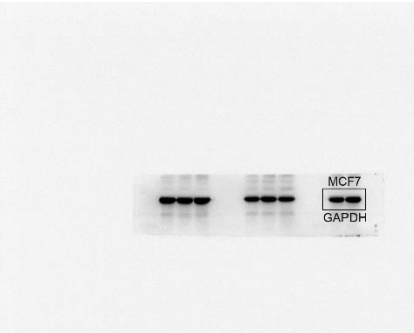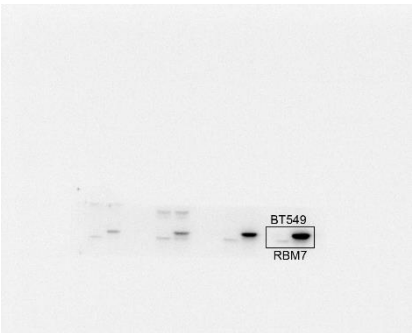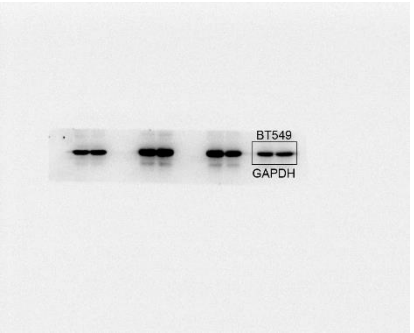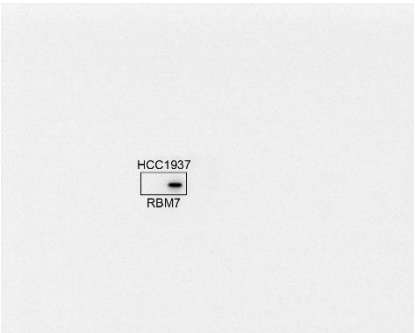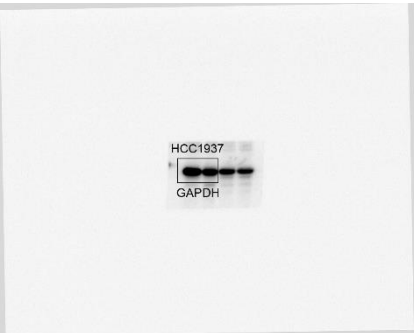

Supplement: fig2-figsupp1-data4 [file elife-95318-fig2-figsupp1-data4-v1.zip]

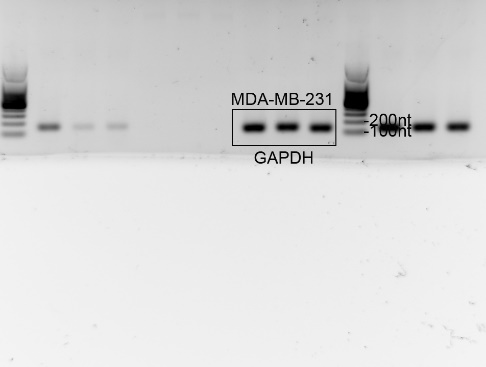

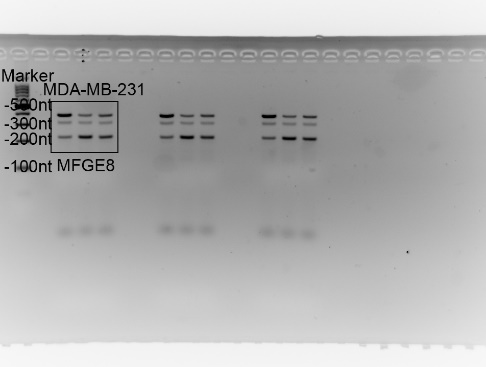




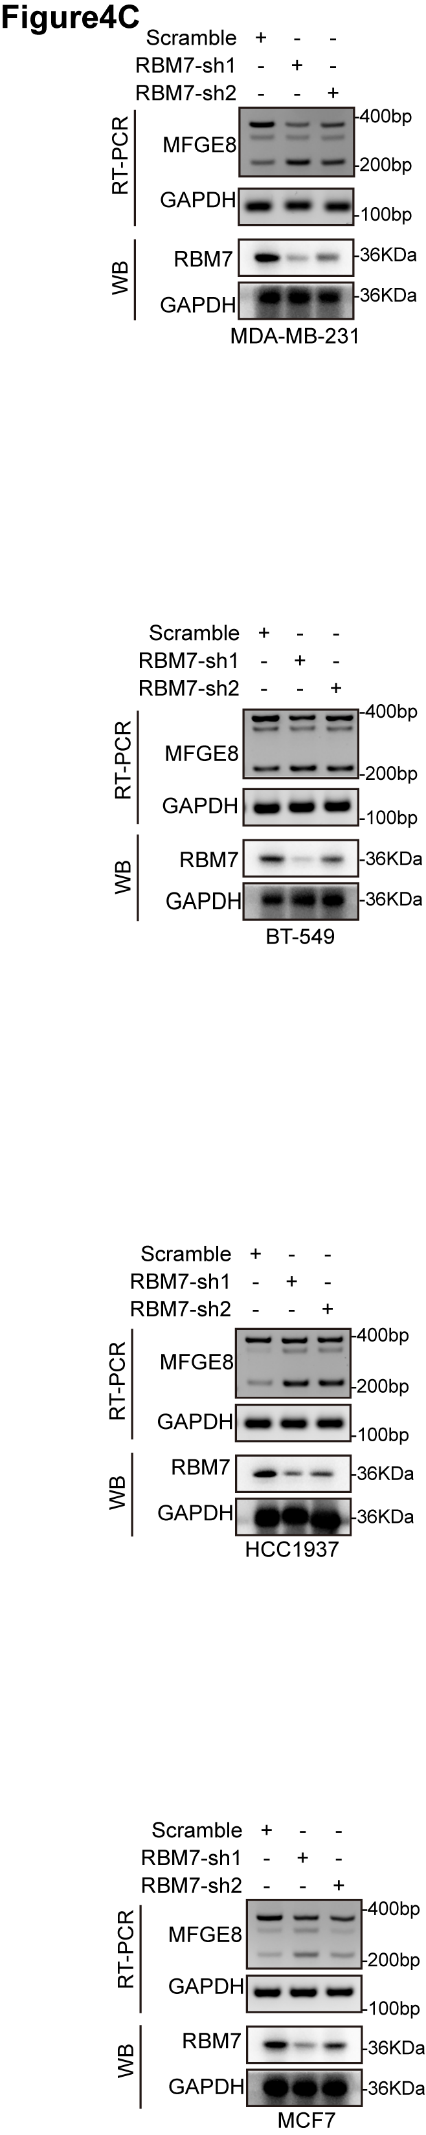





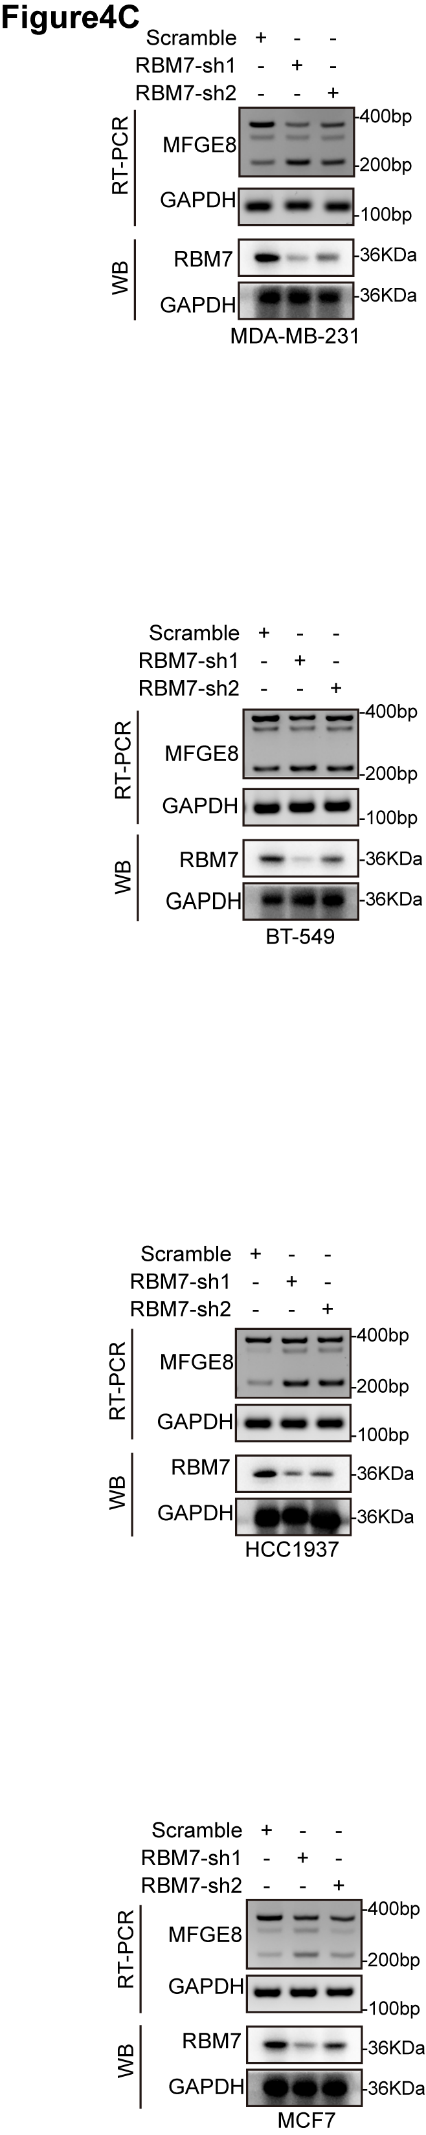




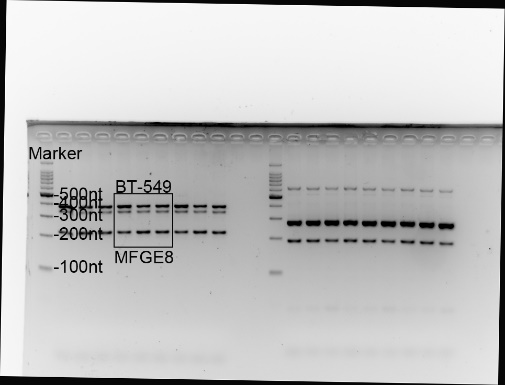








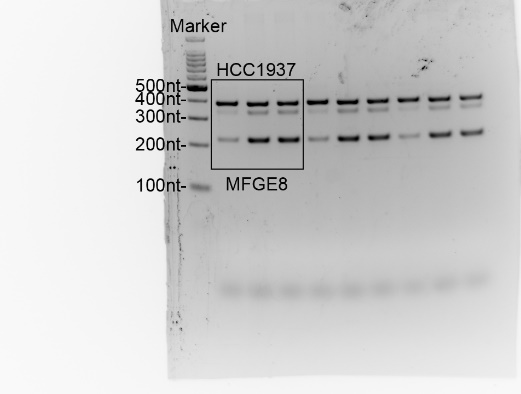

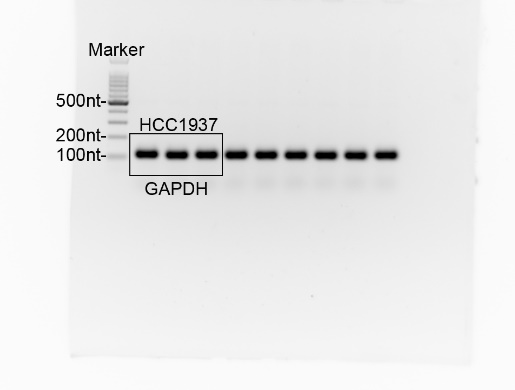



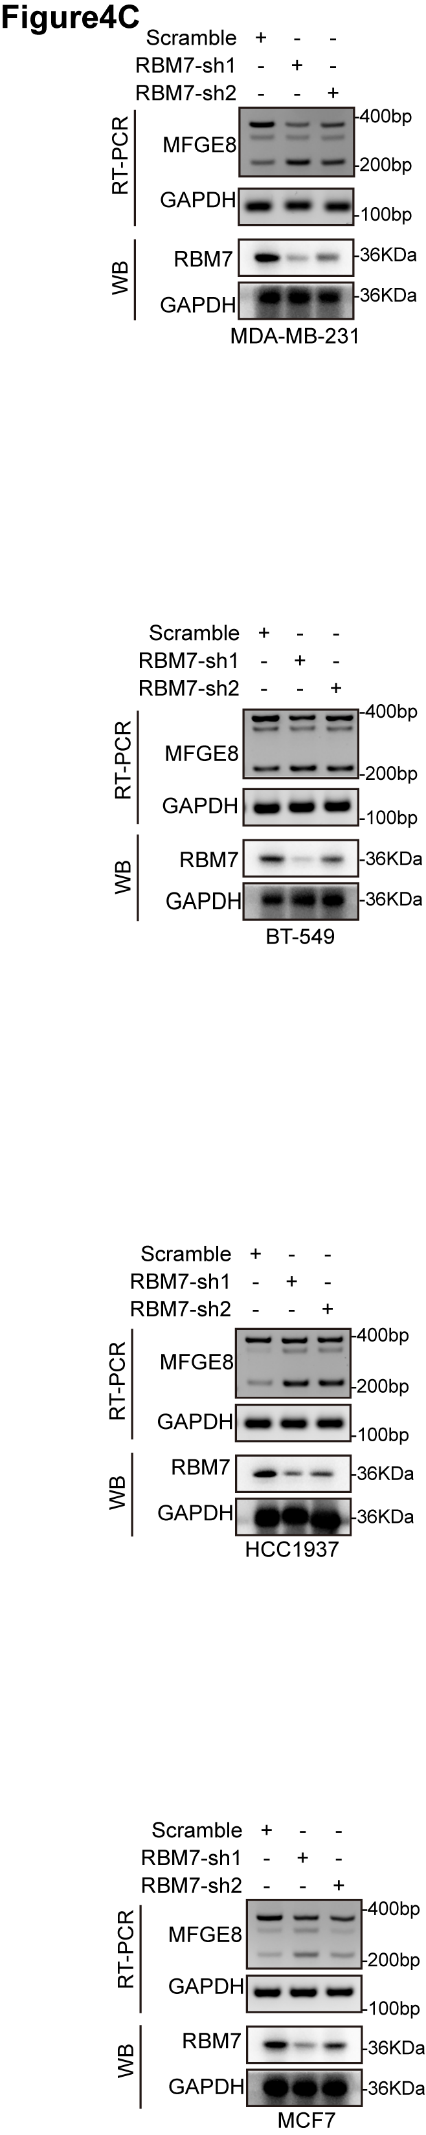





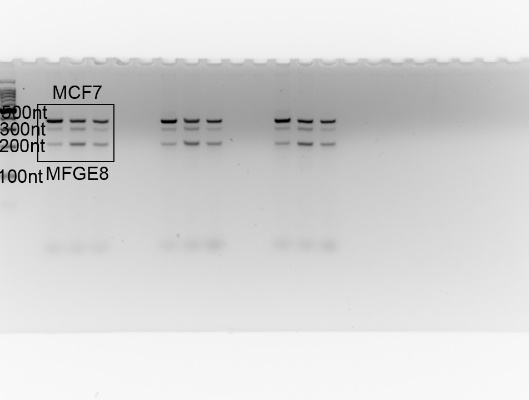




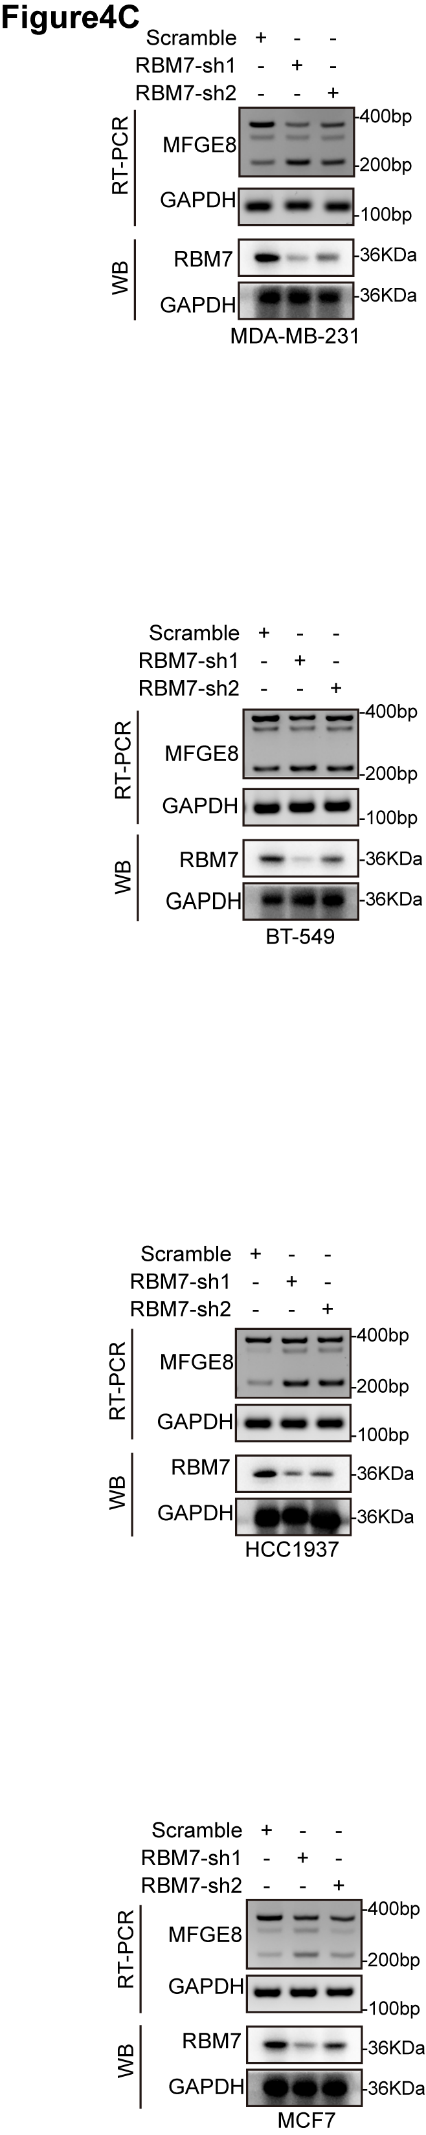

Supplement: fig4-data1 [file Figure4C.docx]

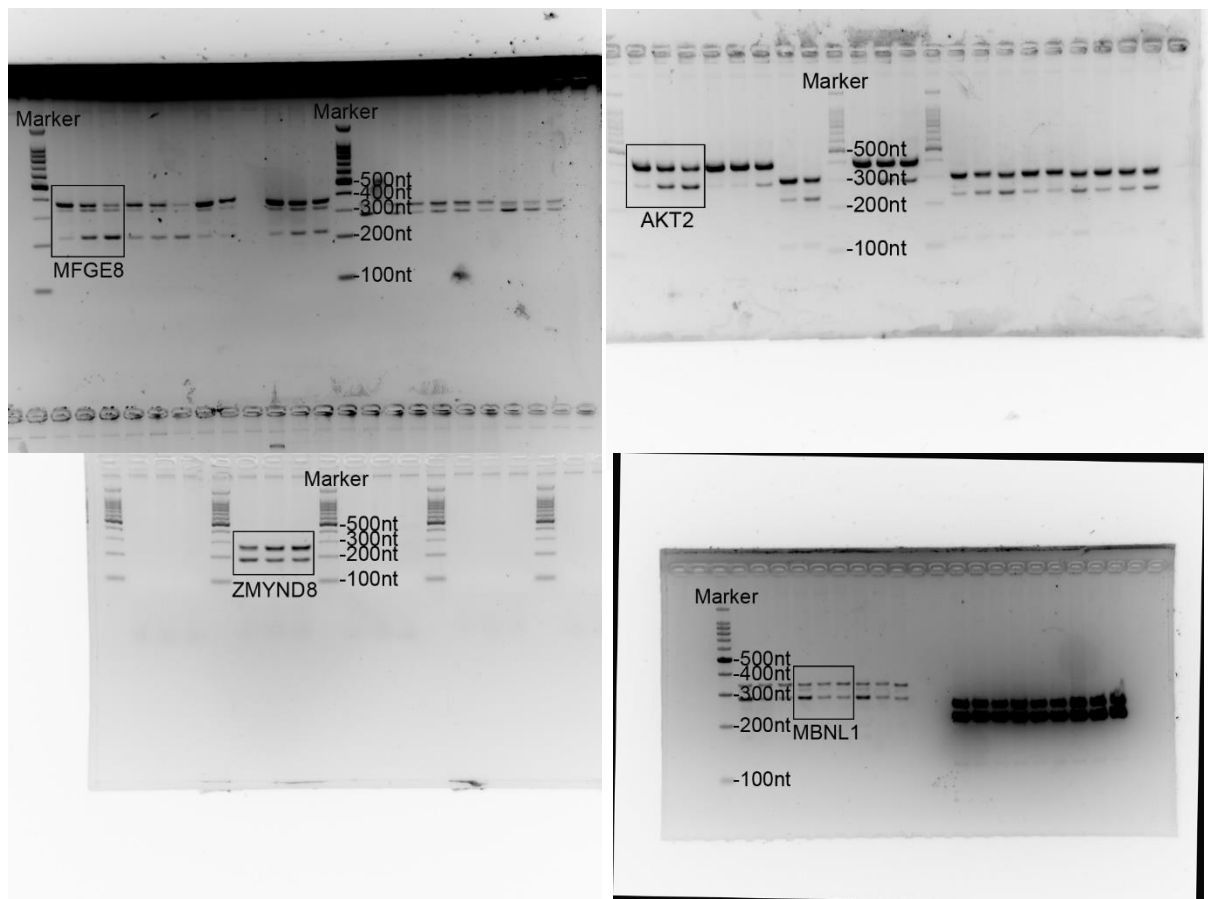

Figure 3F

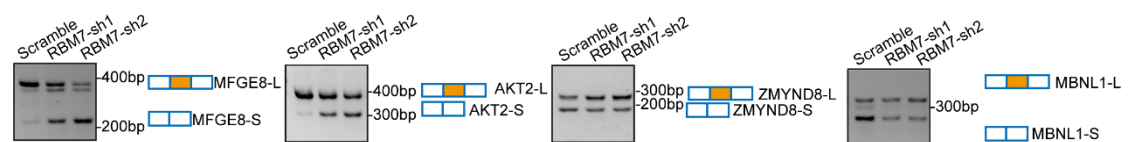

Supplement: fig3-data2 [file elife-95318-fig3-data2-v1.zip]

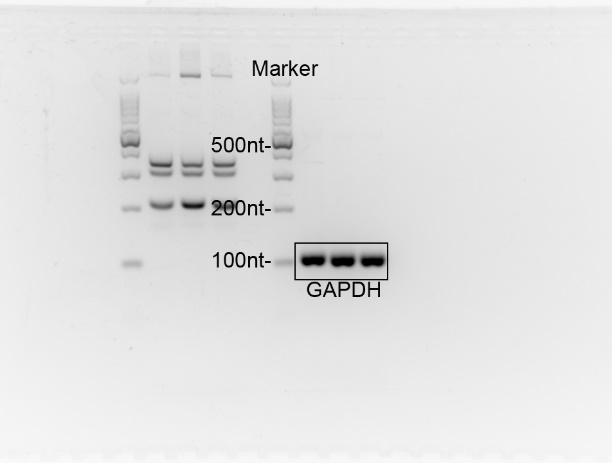

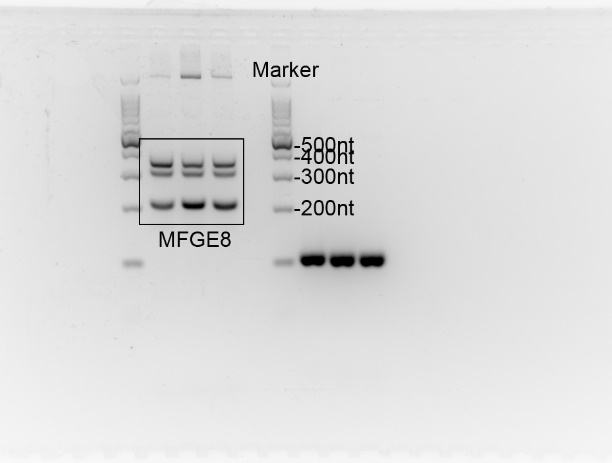

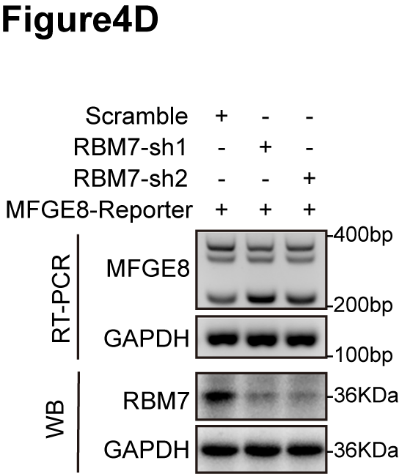

Supplement: fig4-data1 [file Figure4D.docx]

# Sup Figure3B

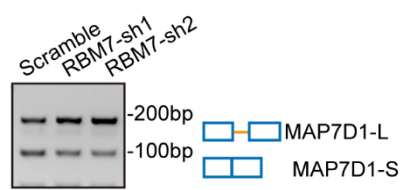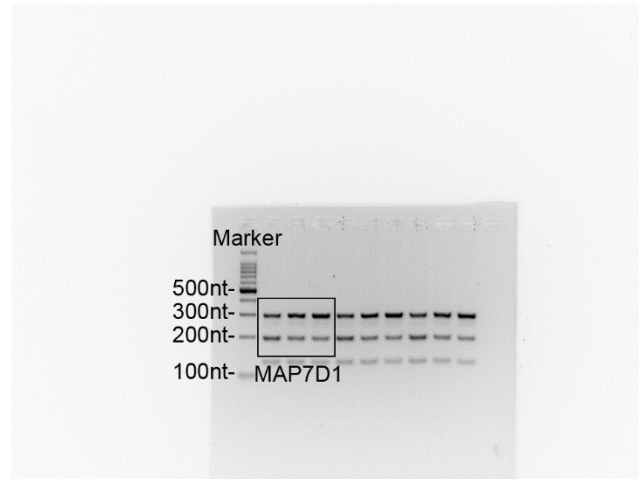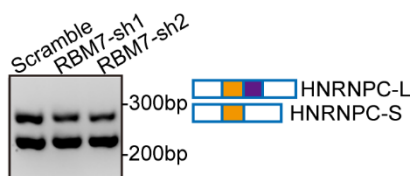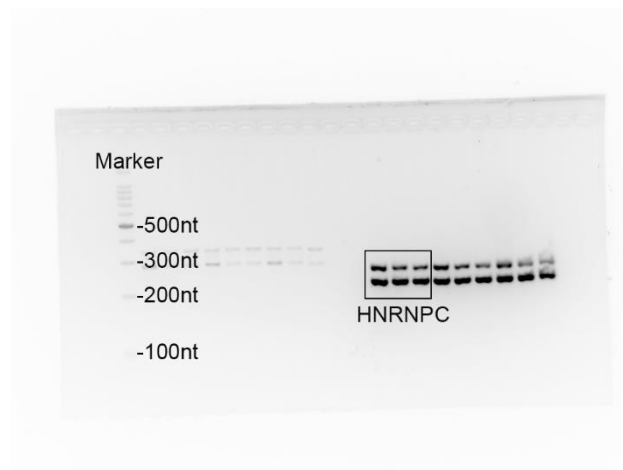

Supplement: fig3-figsupp1-data2 [file elife-95318-fig3-figsupp1-data2-v1.zip]

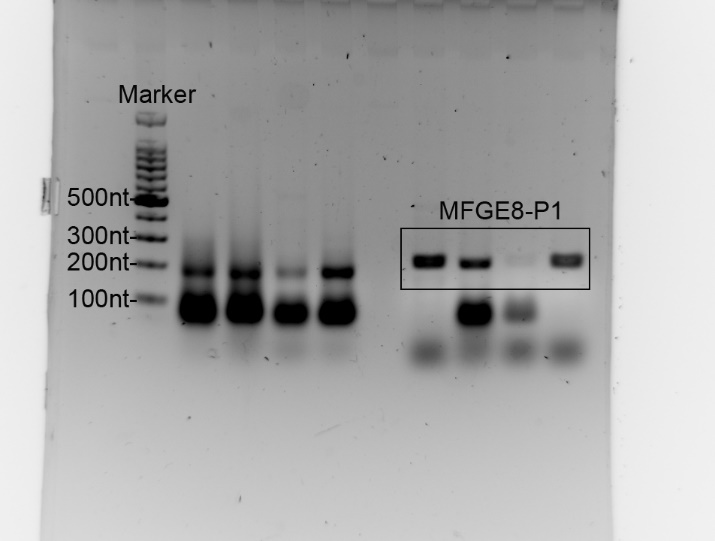

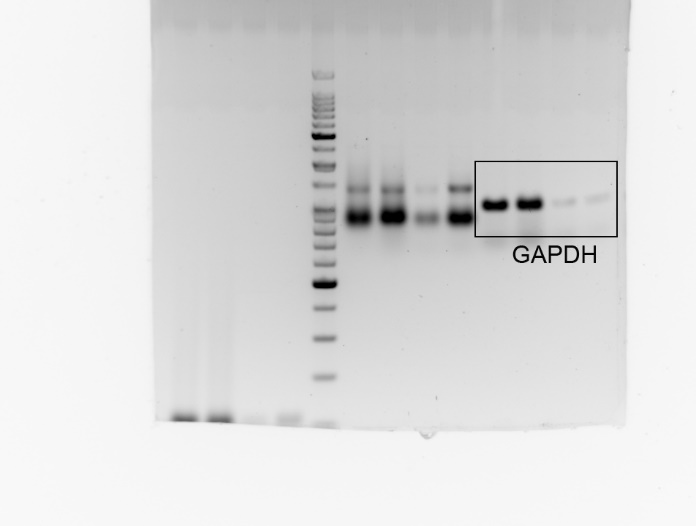

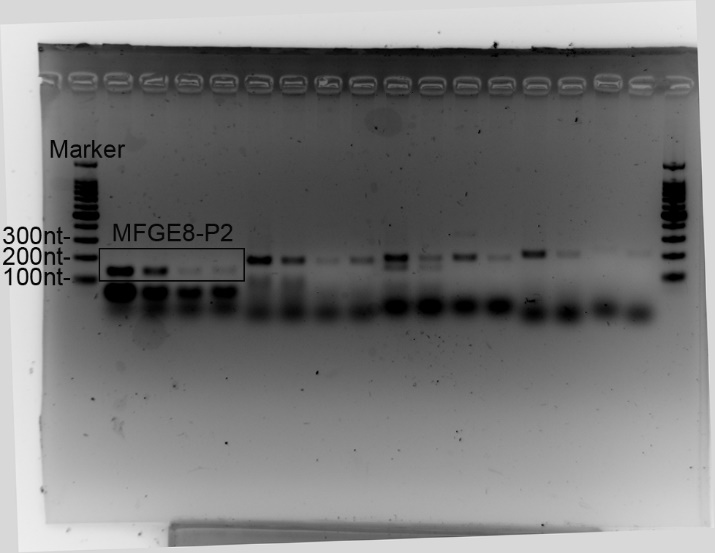

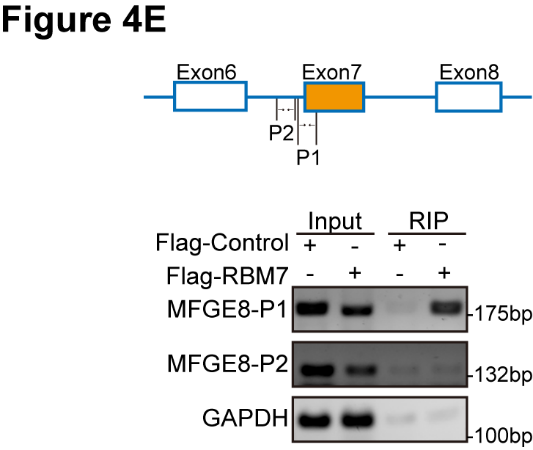

Supplement: fig4-data1 [file Figure4E.docx]

Sup Figure3C

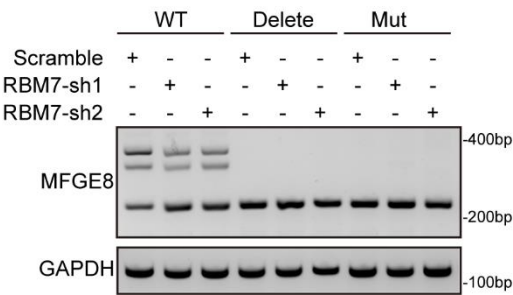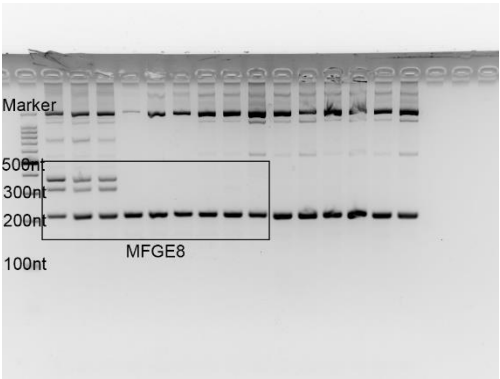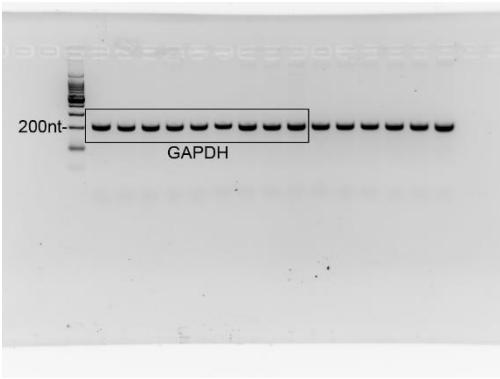

Supplement: fig3-figsupp1-data4 [file elife-95318-fig3-figsupp1-data4-v1.zip]

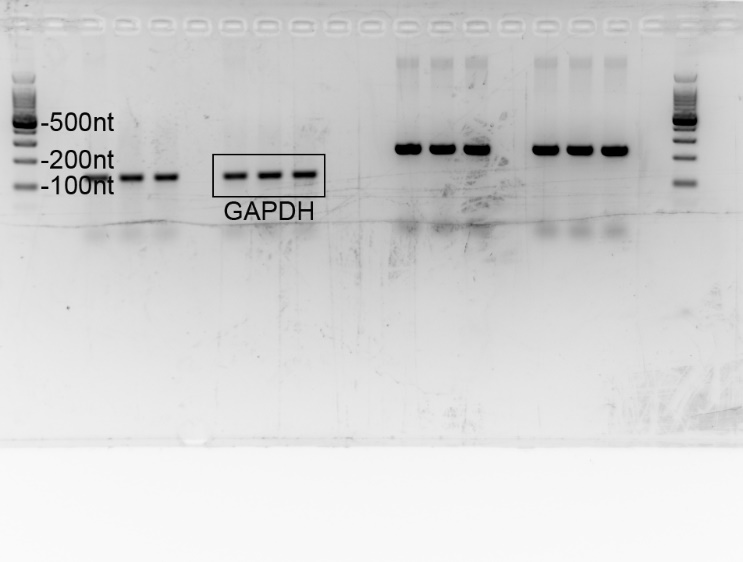

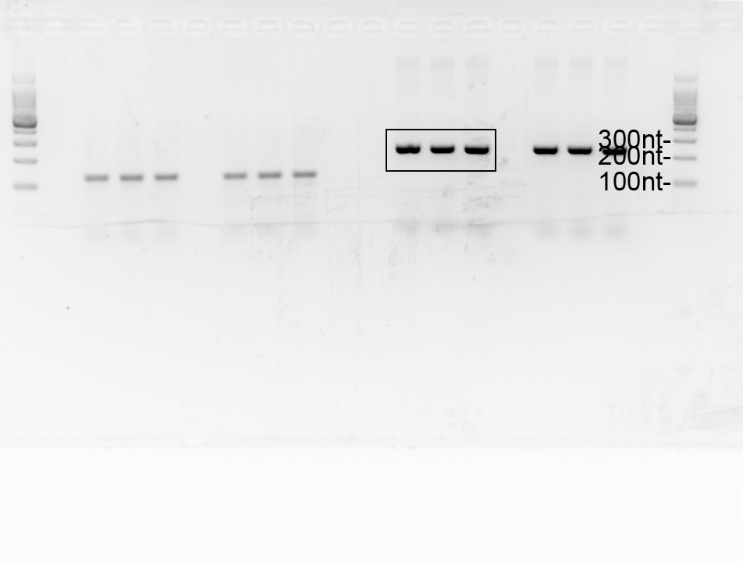

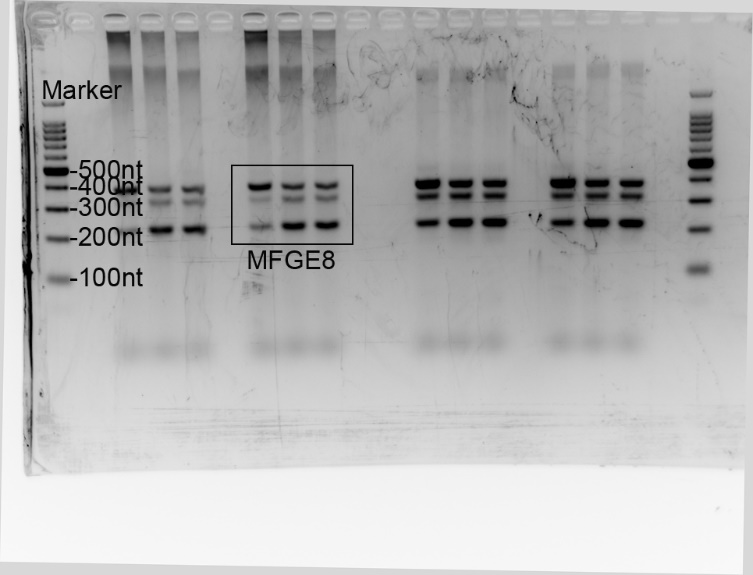

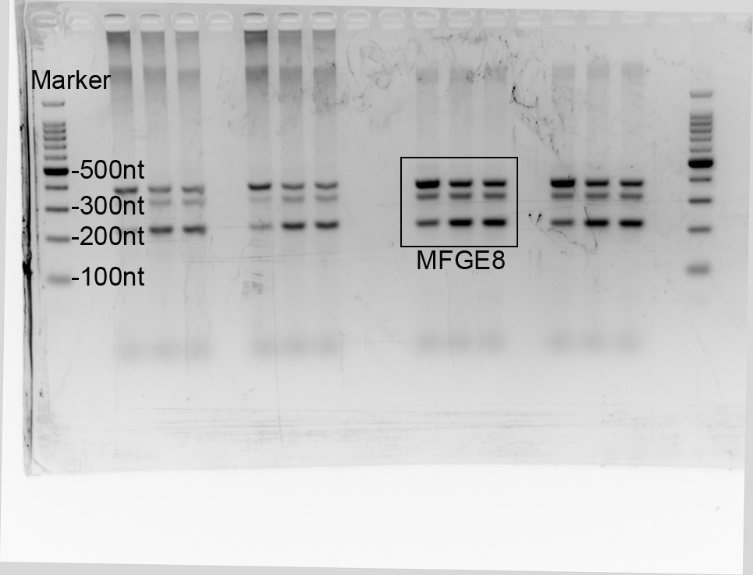

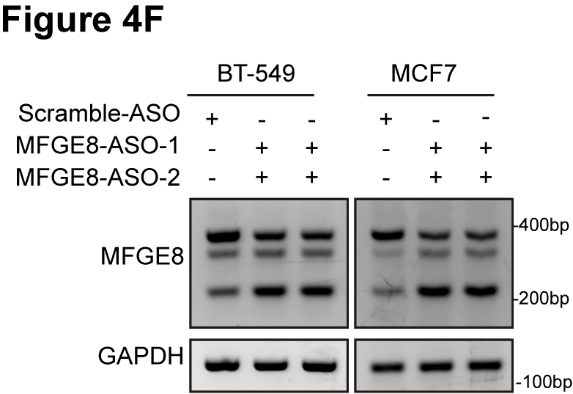

Supplement: fig4-data1 [file Figure4F.docx]

Figure 7C

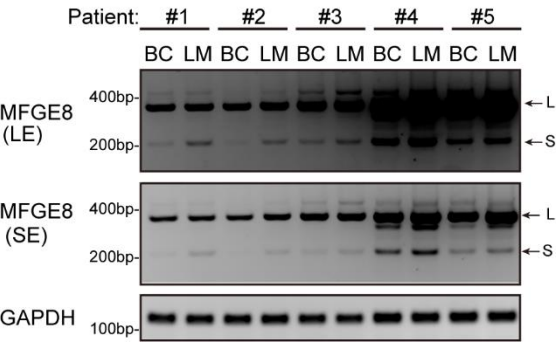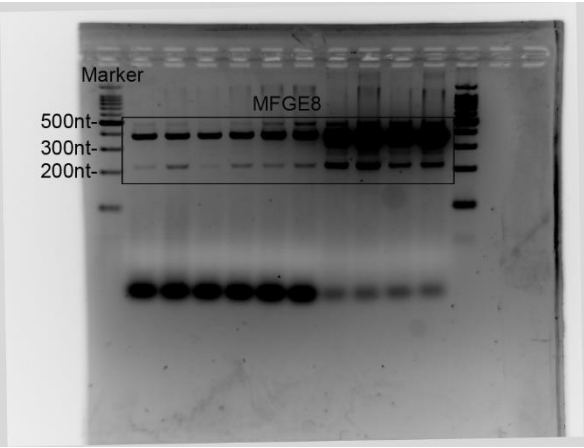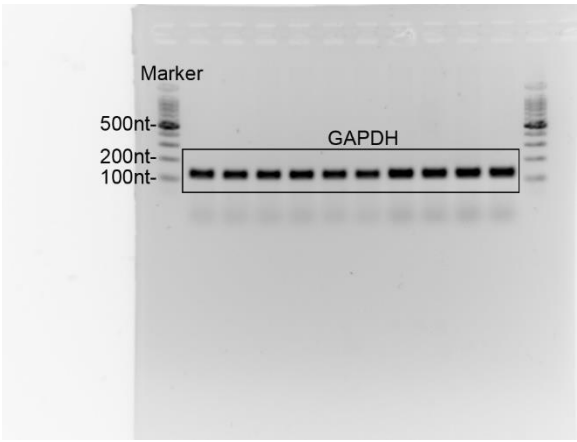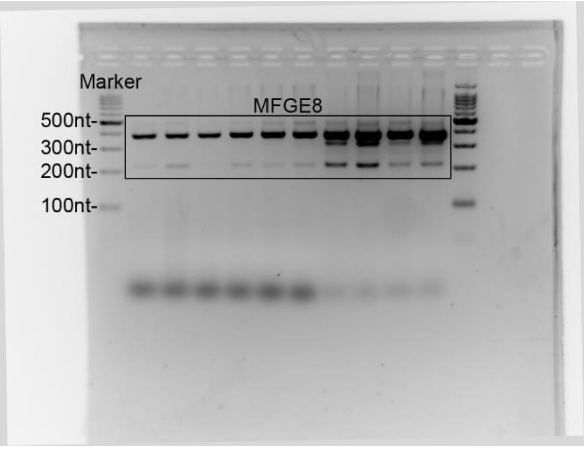

Supplement: fig4-data1 [file elife-95318-fig4-data1-v1.zip]

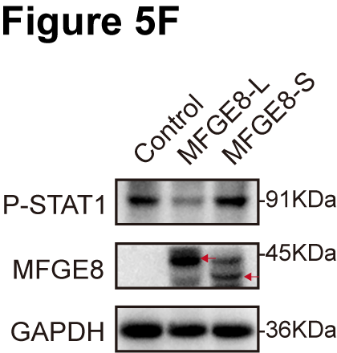

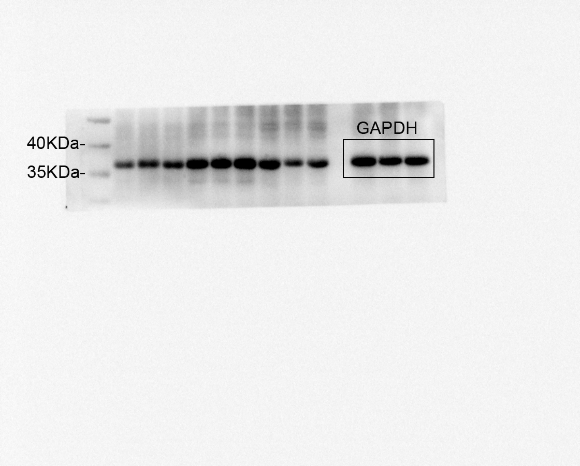

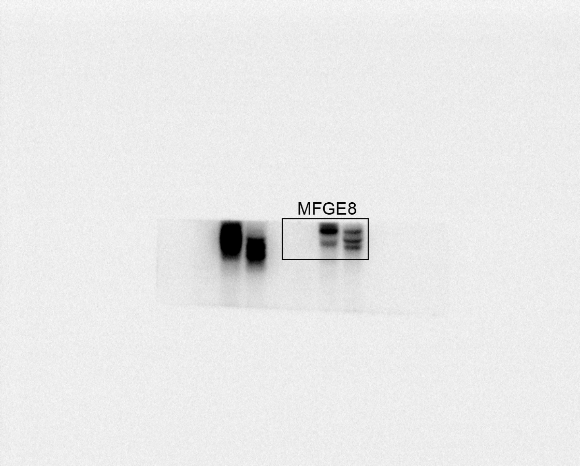

Supplement: fig4-data1 [file Figure5F.docx]

Figure4C

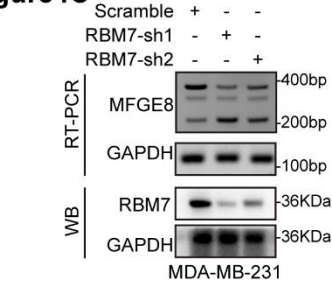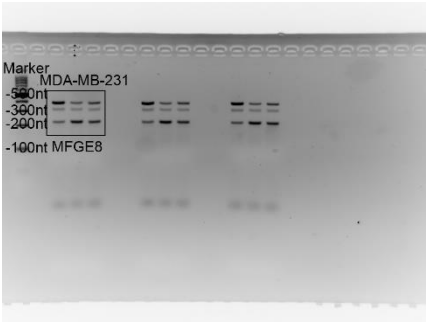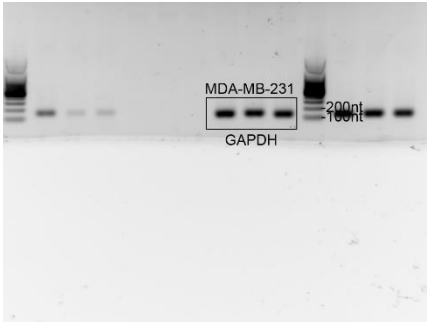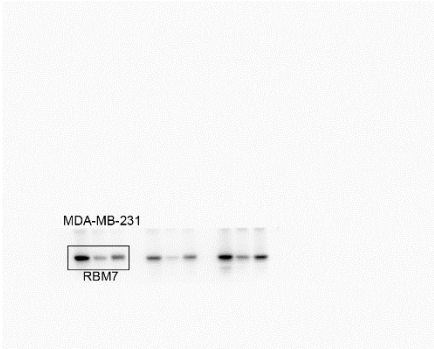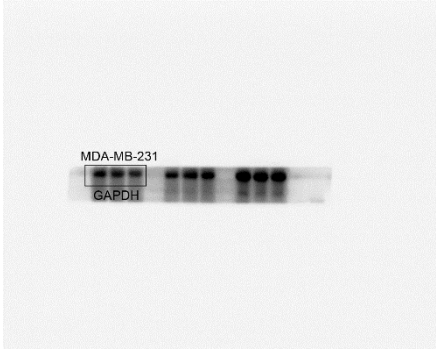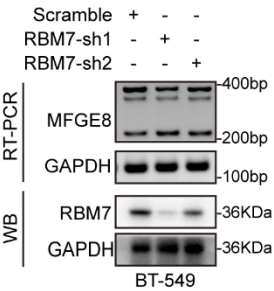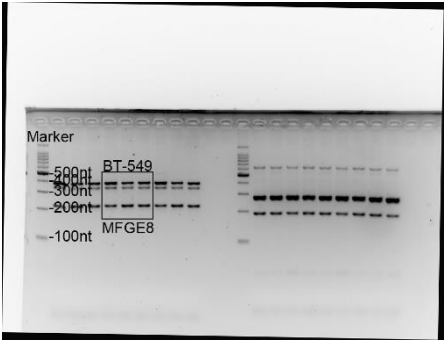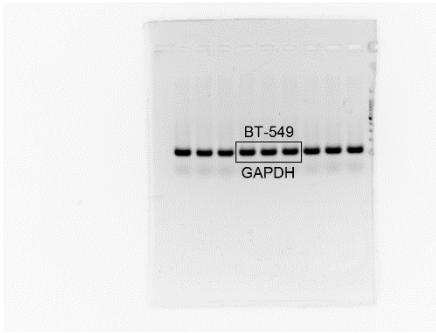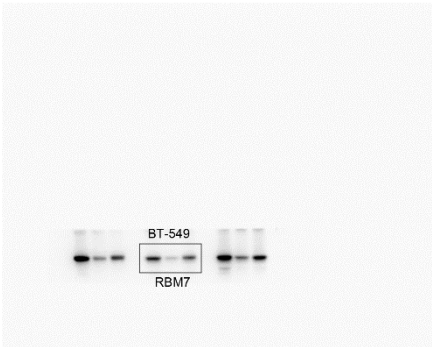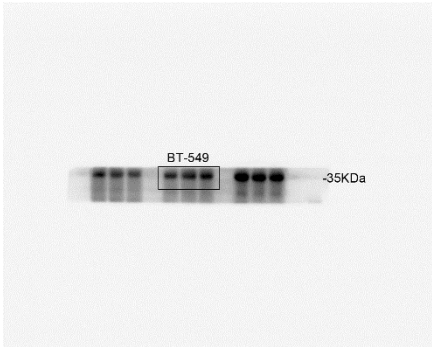

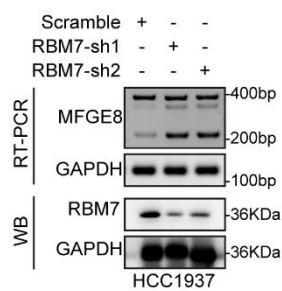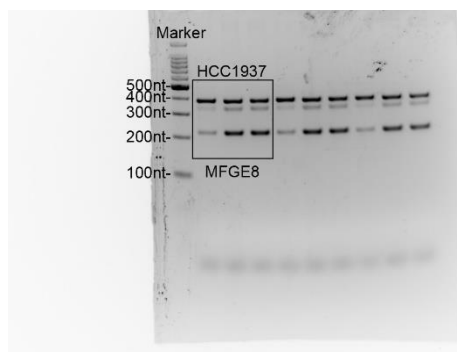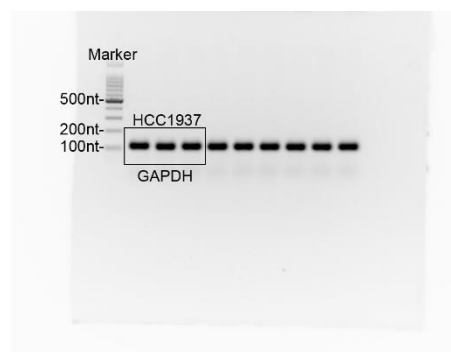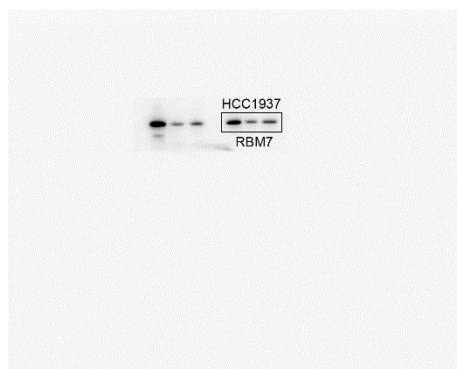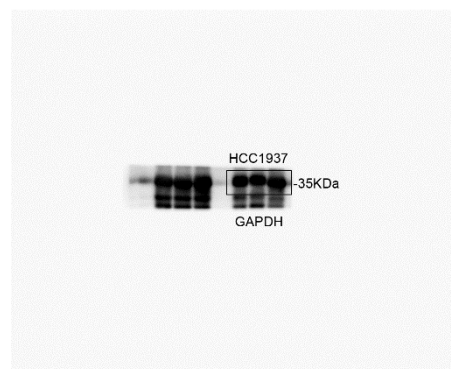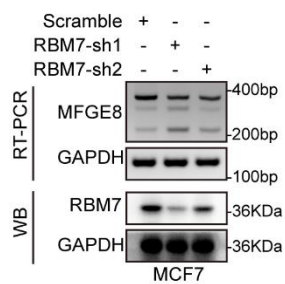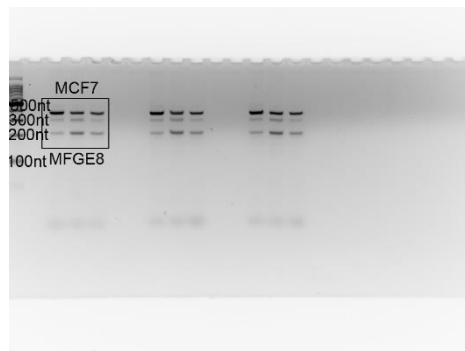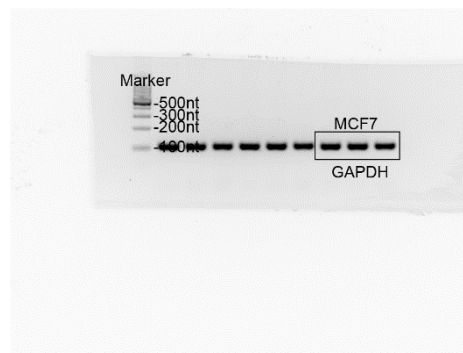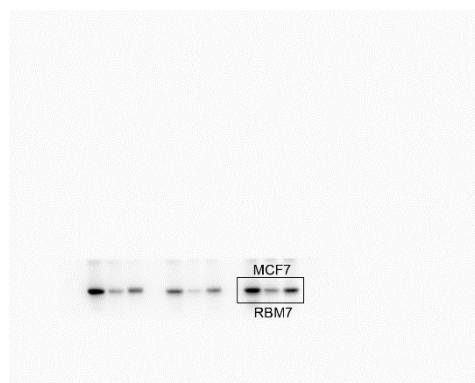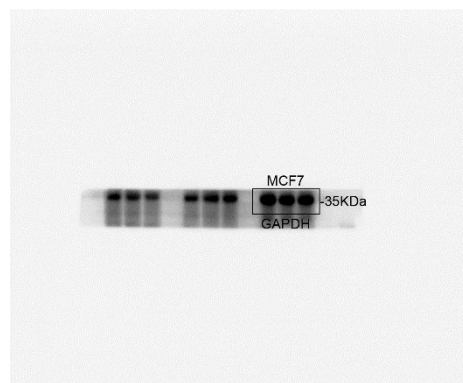

Supplement: fig4-data1 [file elife-95318-fig4-data1-v1.zip]

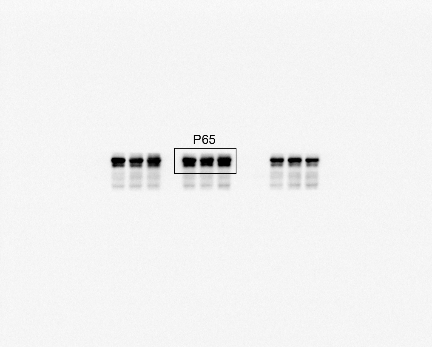

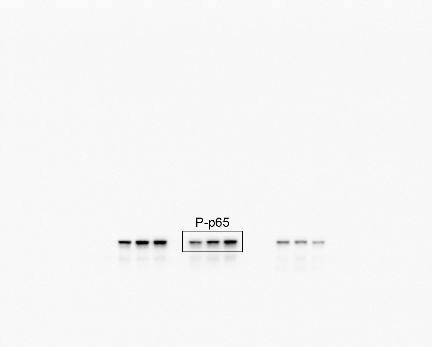

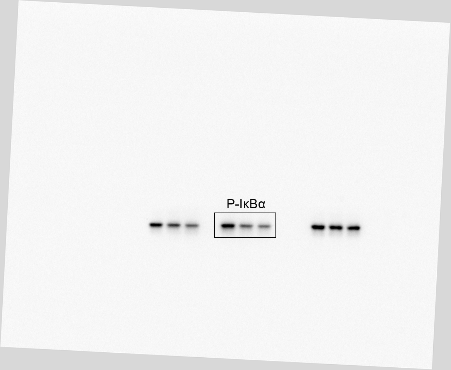

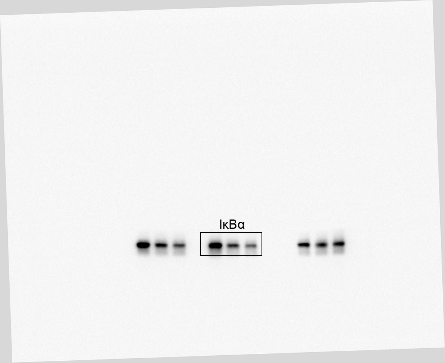

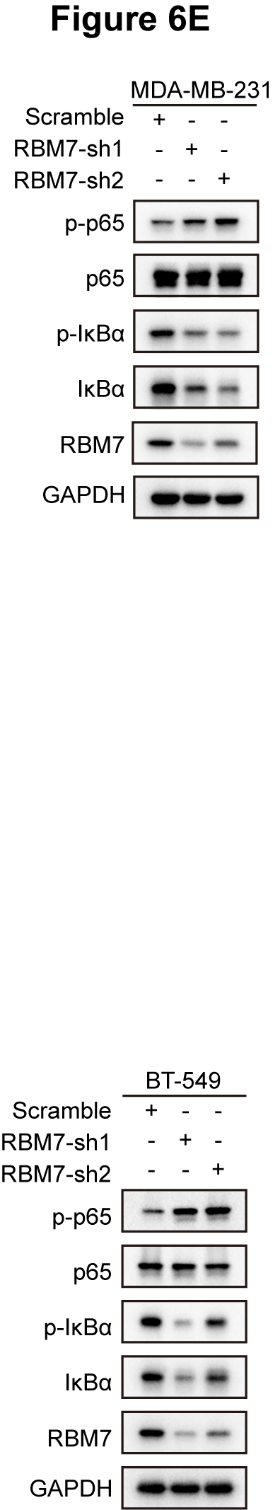


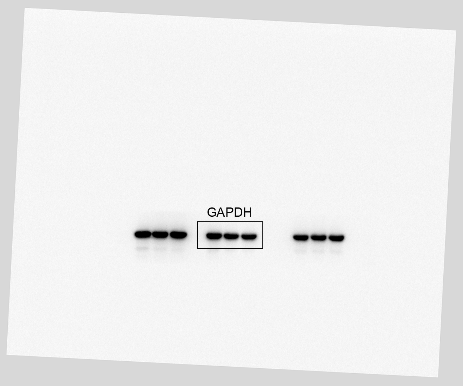











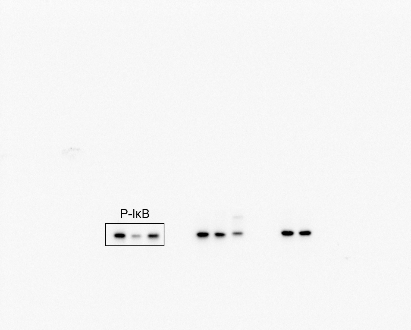

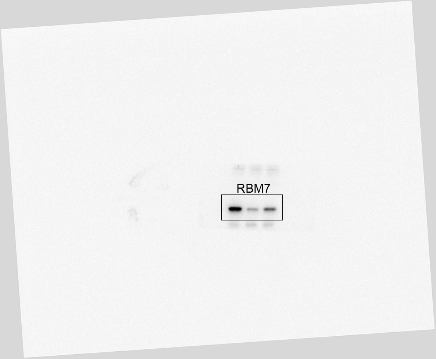



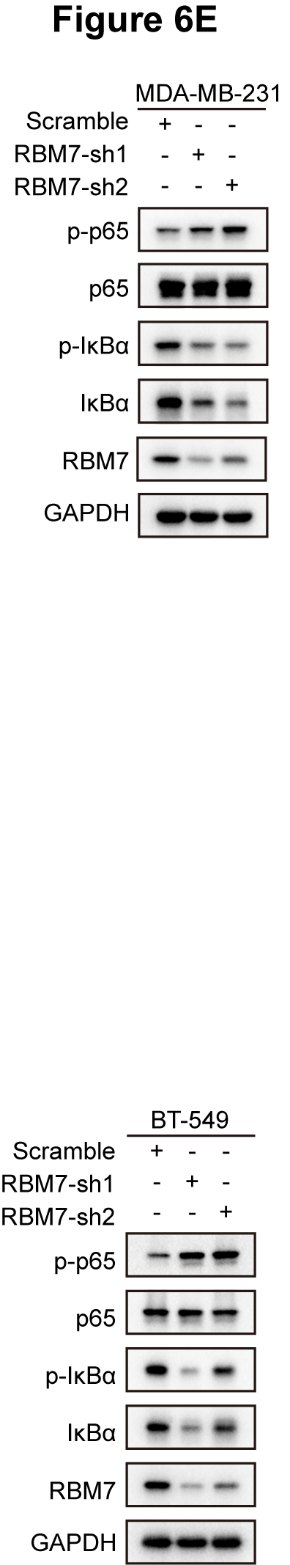

Supplement: fig4-data1 [file Figure 6E.docx]

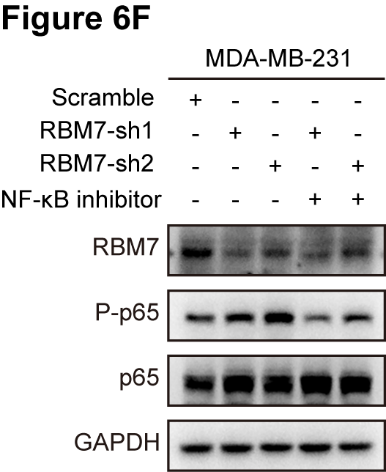

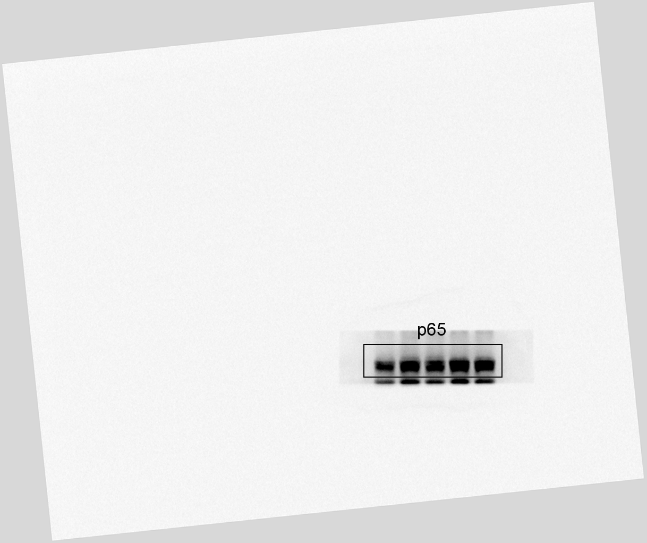

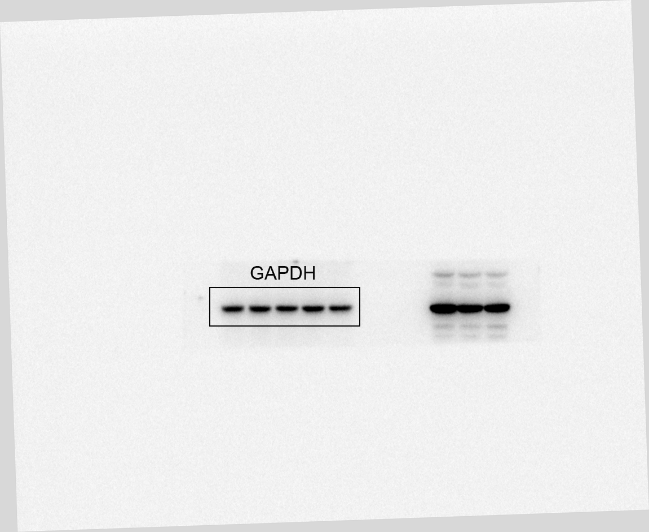

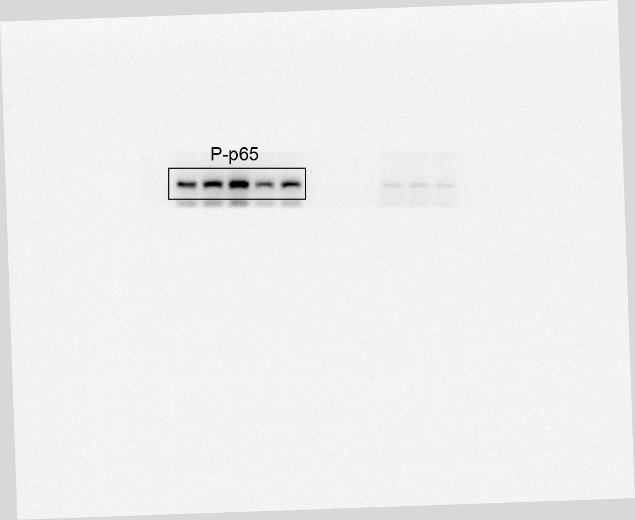

Supplement: fig4-data1 [file Figure6F.docx]

Figure 4F

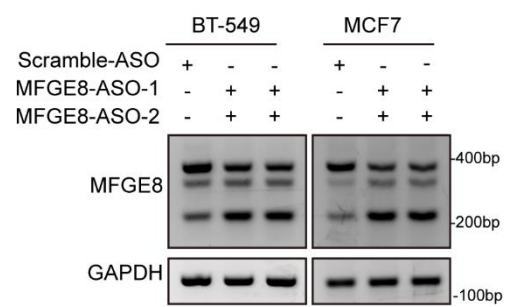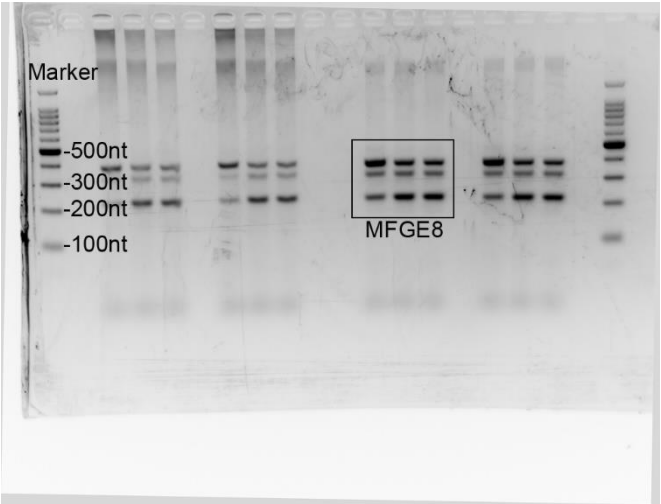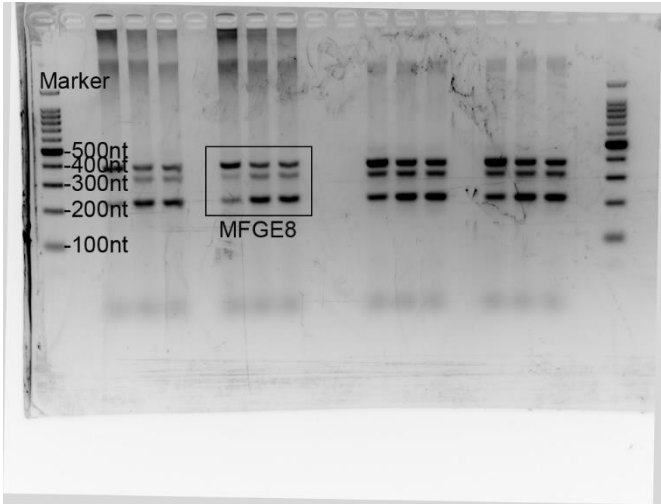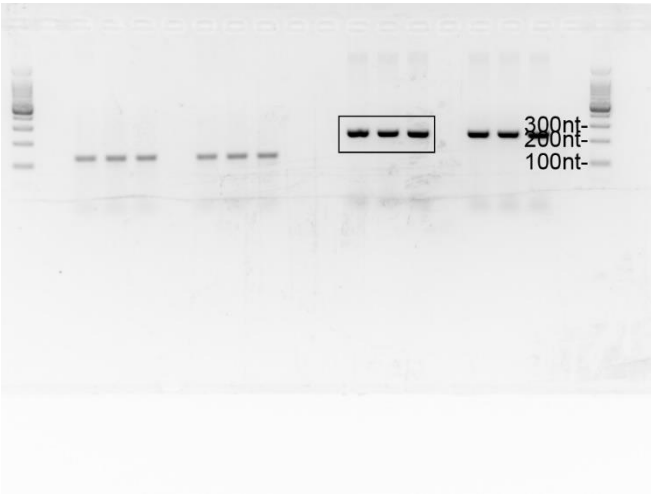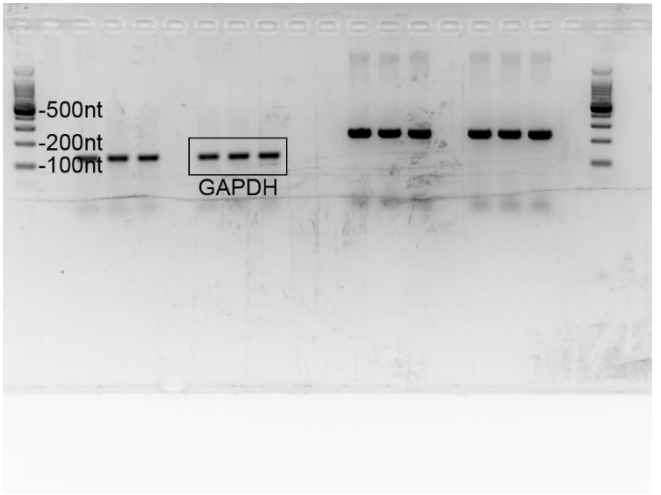

Supplement: fig4-data1 [file elife-95318-fig4-data1-v1.zip]

Figure 5F

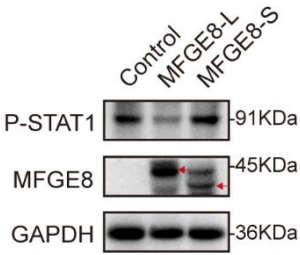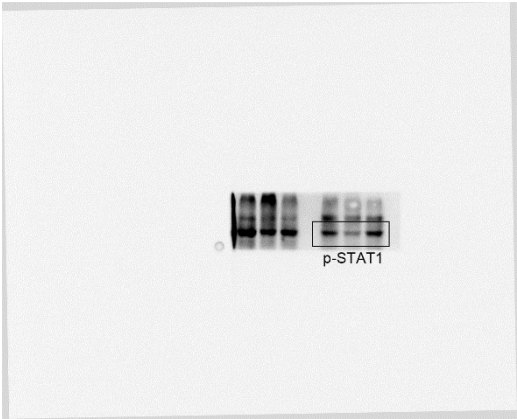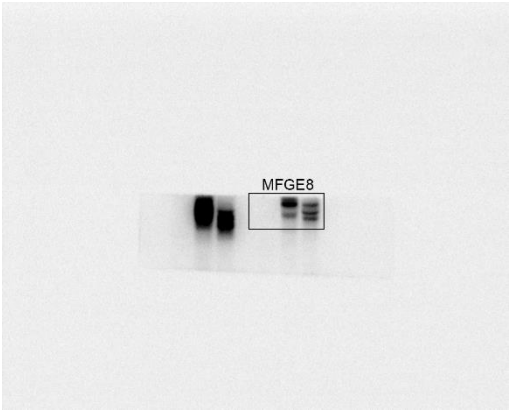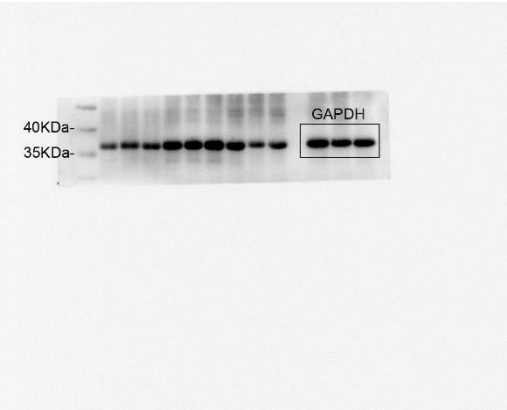

Supplement: fig4-data1 [file elife-95318-fig4-data1-v1.zip]

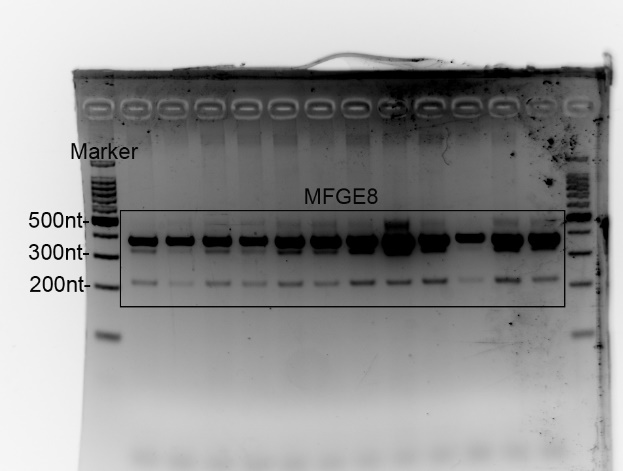

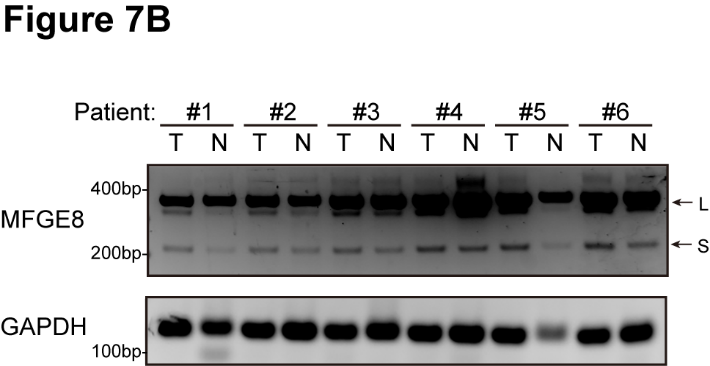

Supplement: fig4-data1 [file Figure7B.docx]

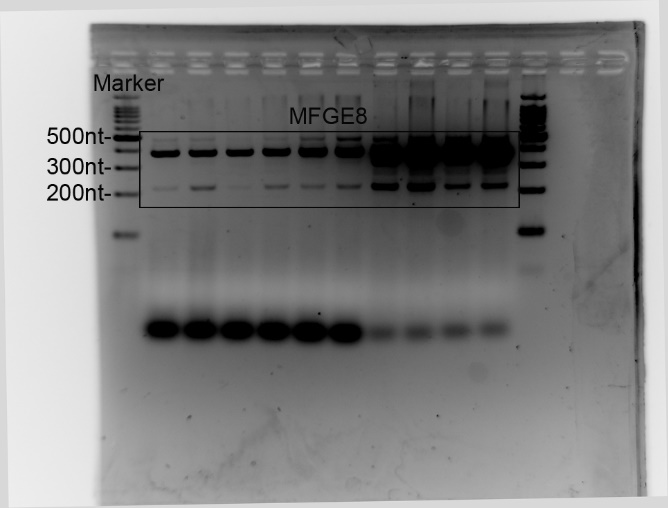

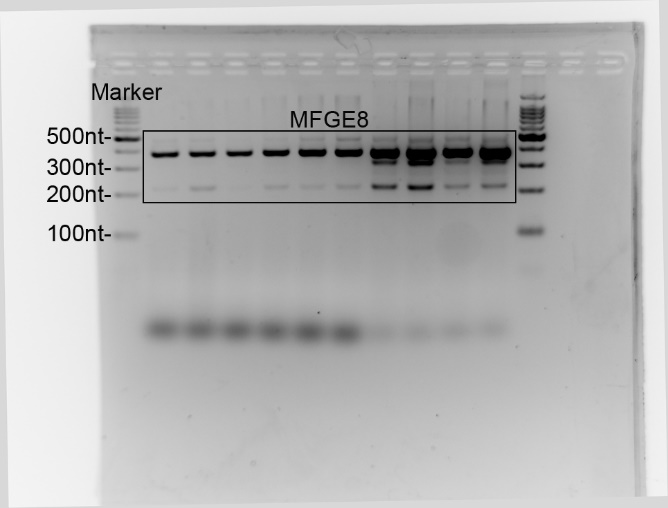

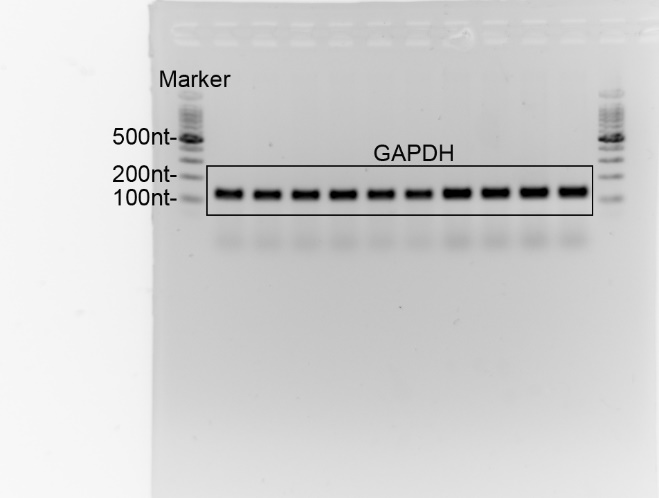

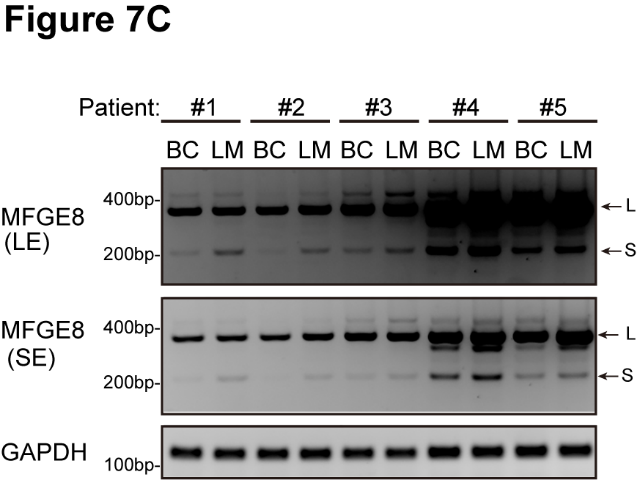

Supplement: fig4-data1 [file Figure7C.docx]

Figure4D

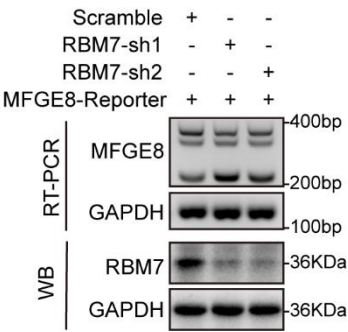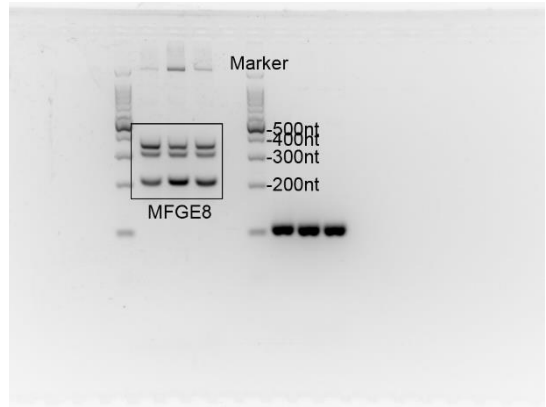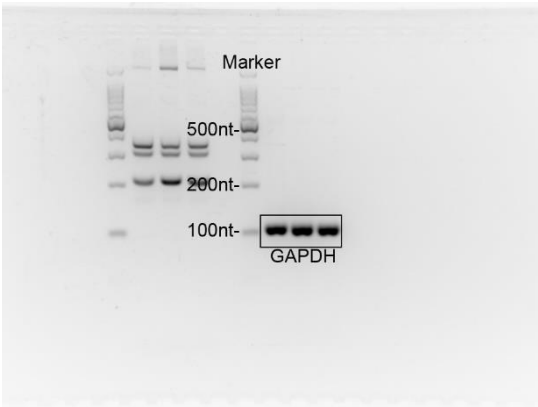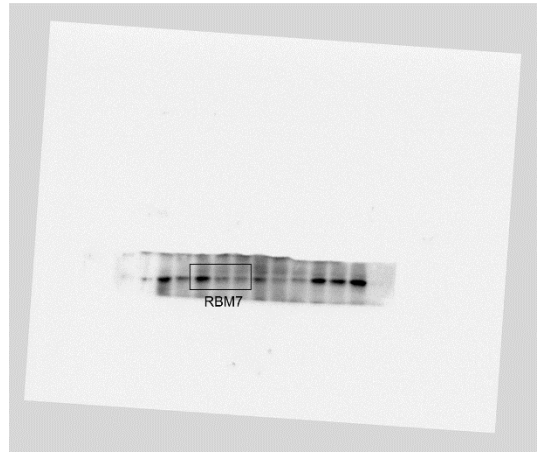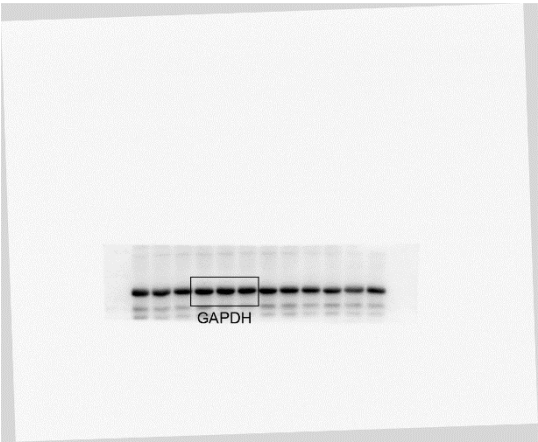

Supplement: fig4-data1 [file elife-95318-fig4-data1-v1.zip]

Figure 6E

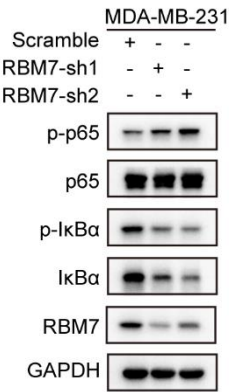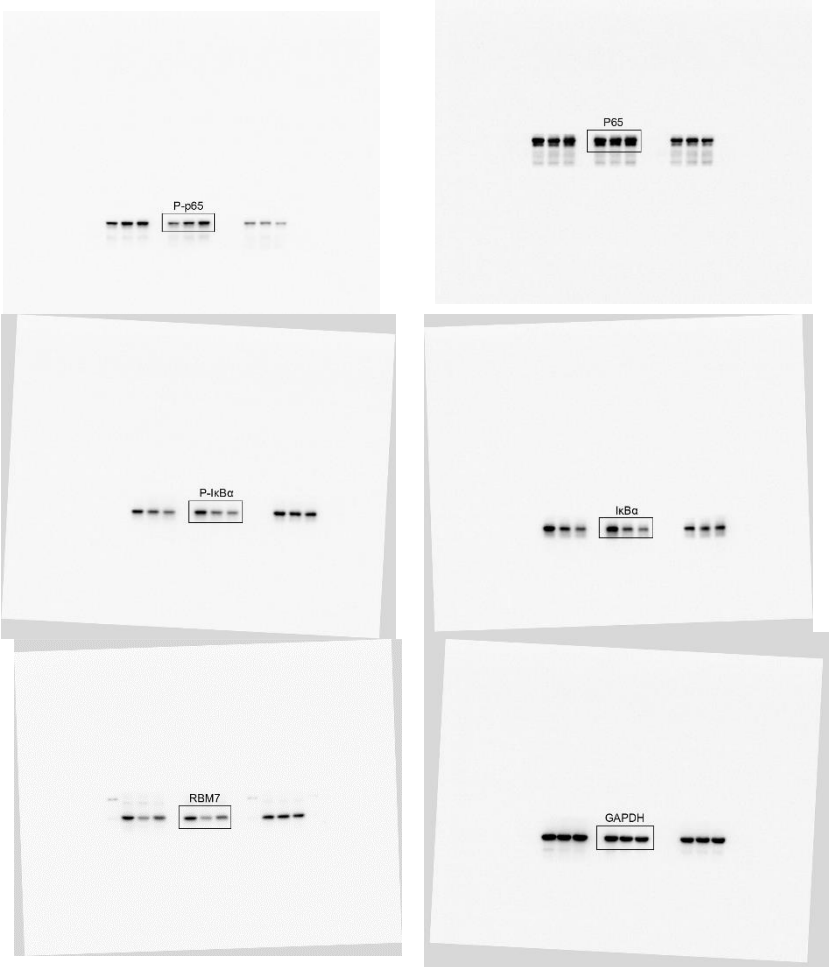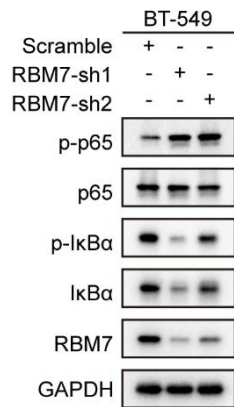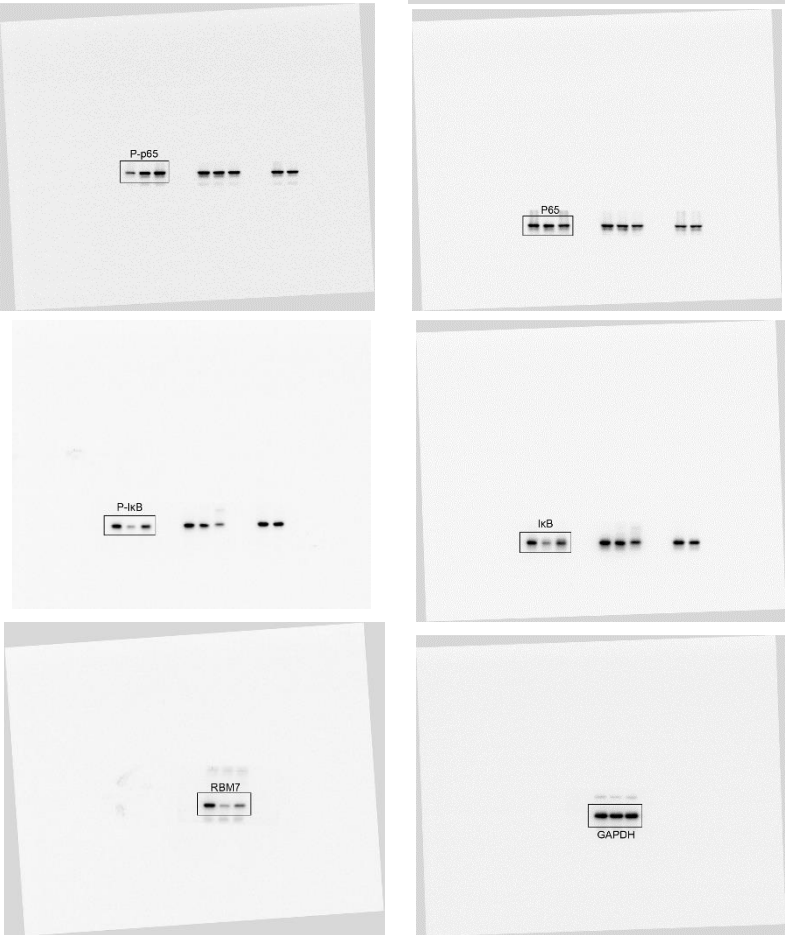

Supplement: fig4-data1 [file elife-95318-fig4-data1-v1.zip]

Figure 7B

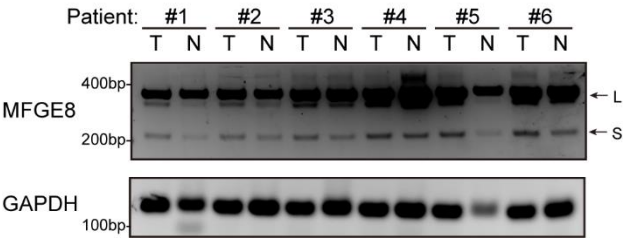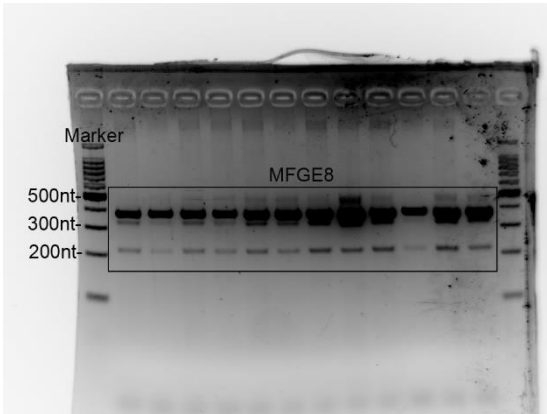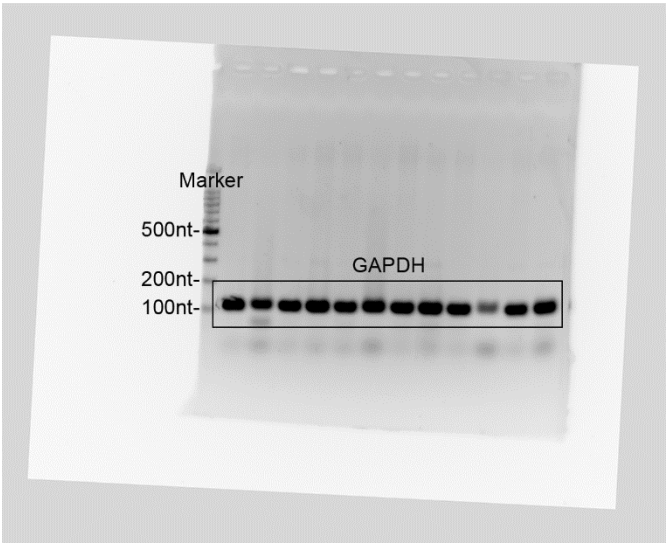

Supplement: fig4-data1 [file elife-95318-fig4-data1-v1.zip]

Figure 4E

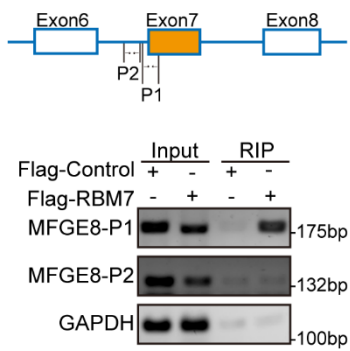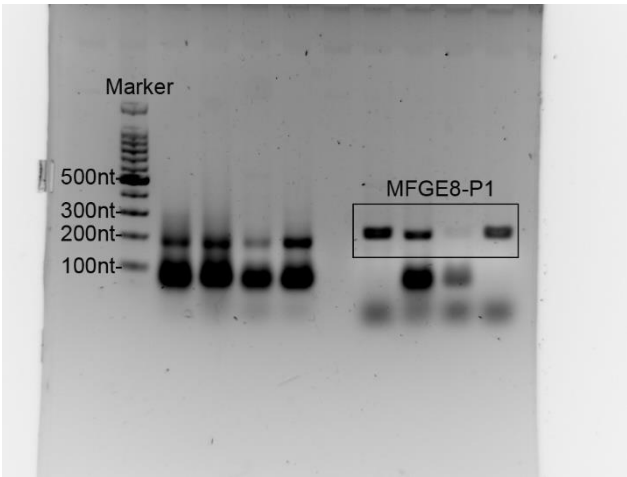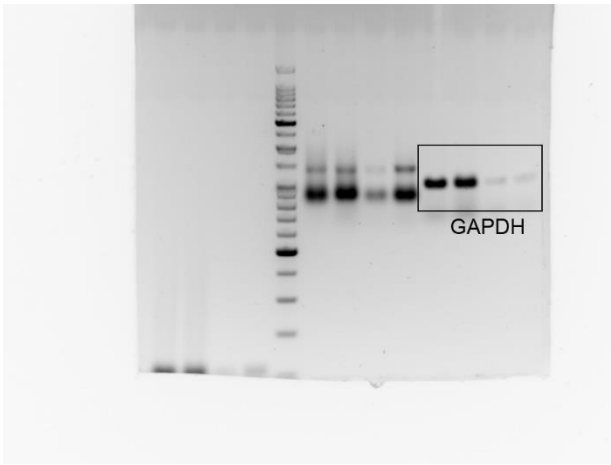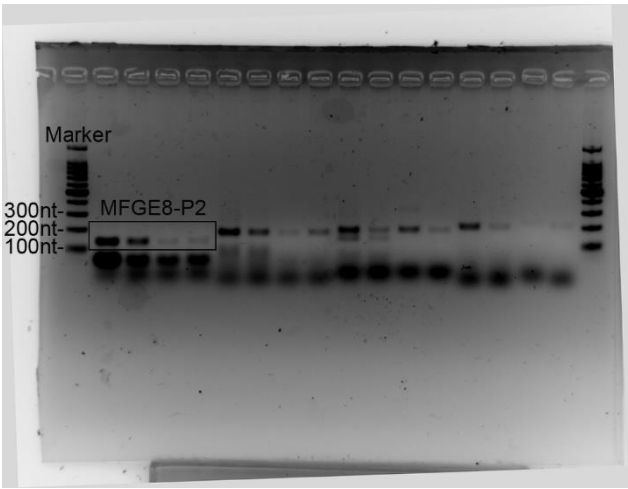

Supplement: fig4-data1 [file elife-95318-fig4-data1-v1.zip]

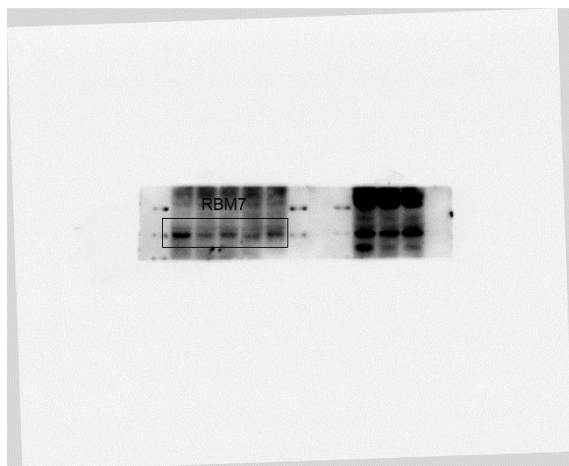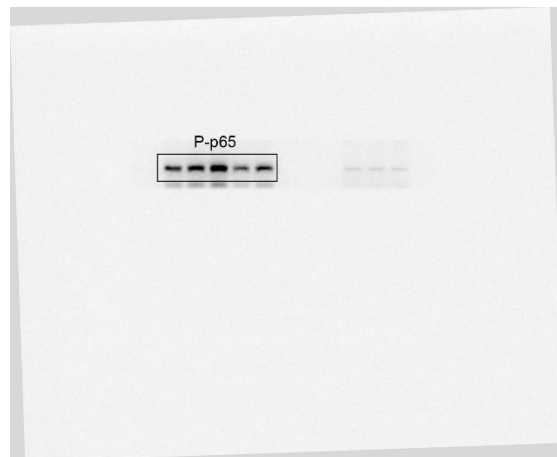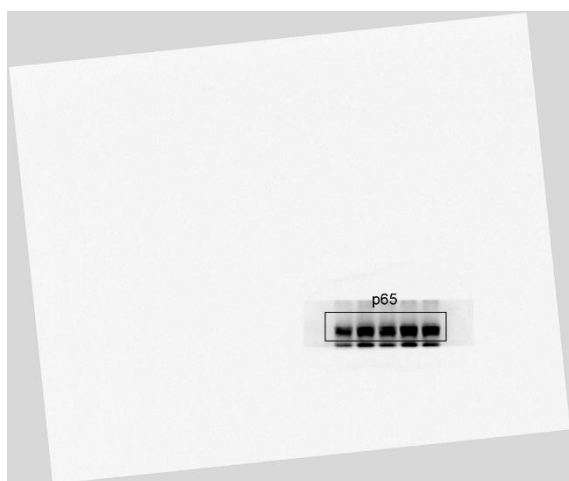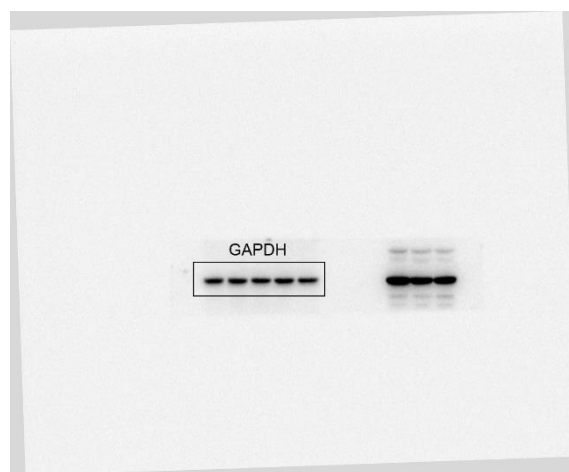

**Figure 6F**

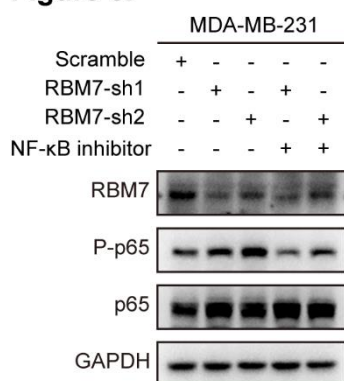

Supplement: fig4-data1 [file elife-95318-fig4-data1-v1.zip]

Sup Figure4A

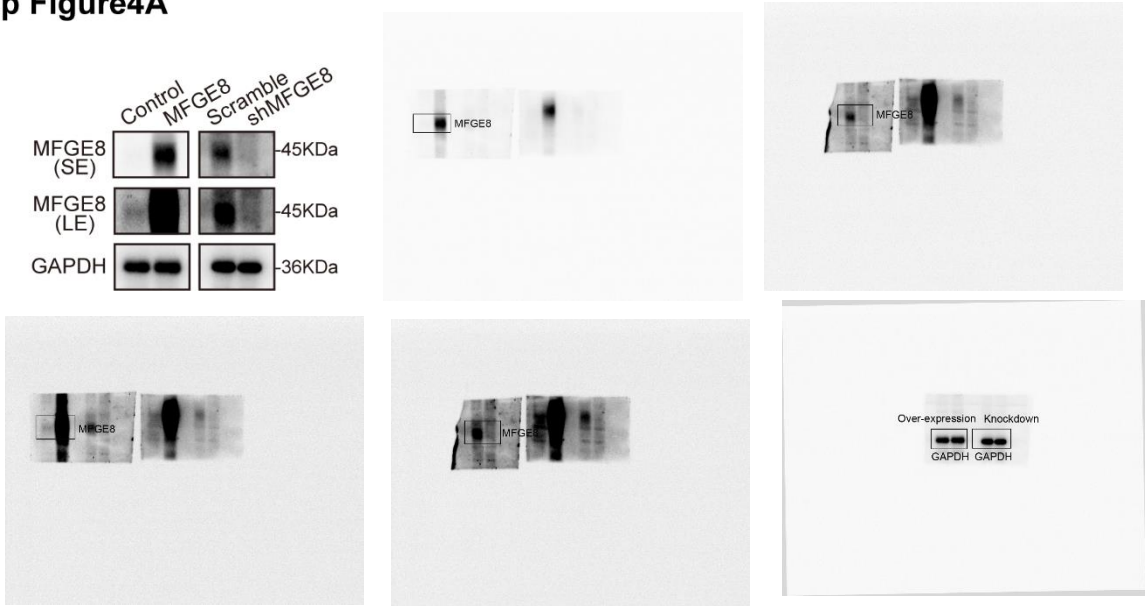

Supplement: fig5-figsupp1-data2 [file elife-95318-fig5-figsupp1-data2-v1.zip]

Sup Figure4D

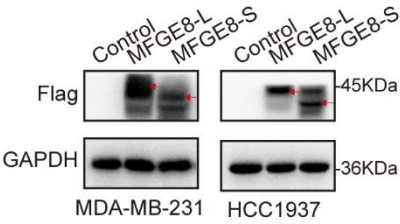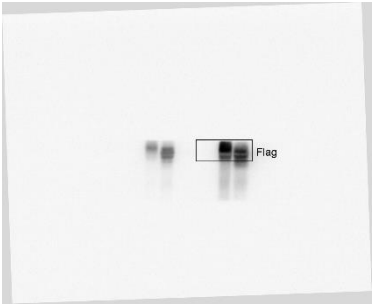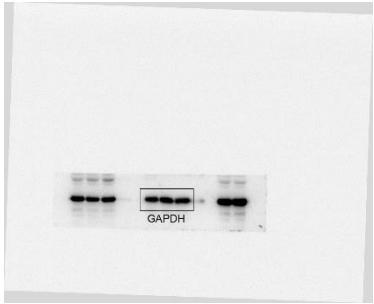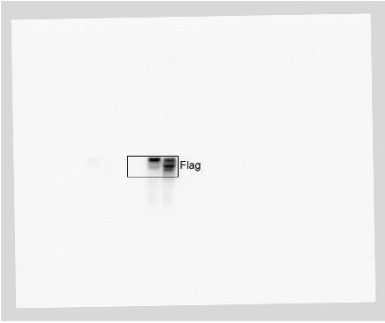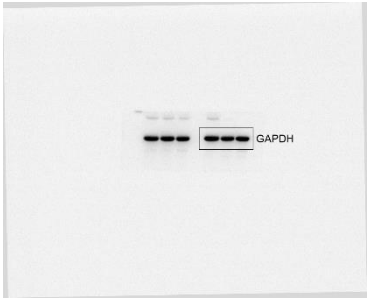

Supplement: fig5-figsupp1-data4 [file elife-95318-fig5-figsupp1-data4-v1.zip]

Sup Figure5B

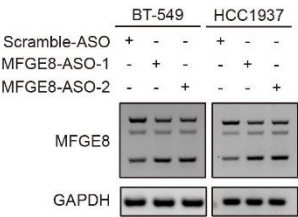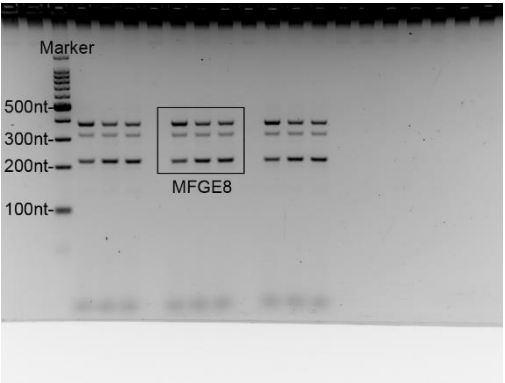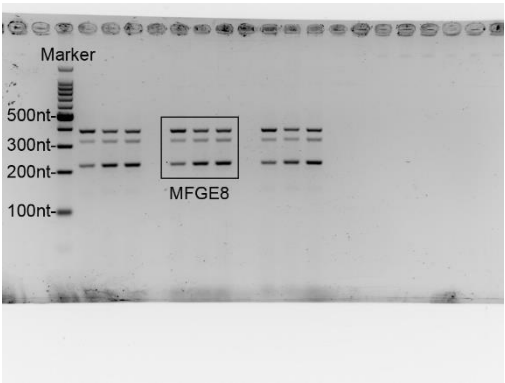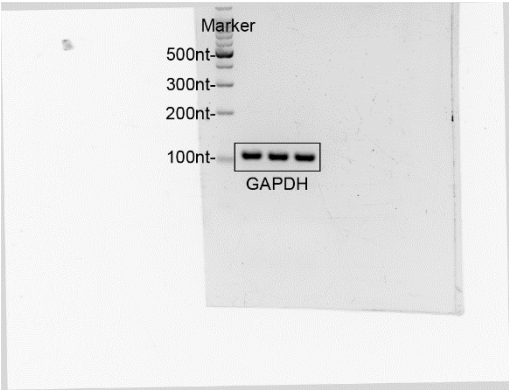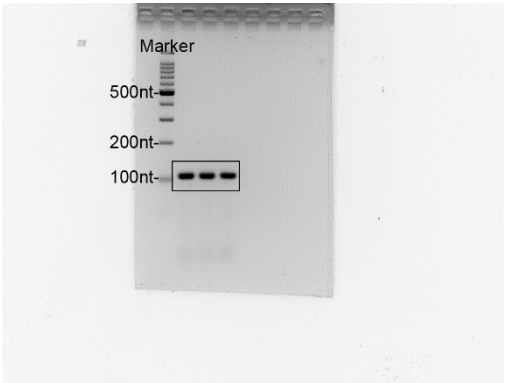

Supplement: fig6-figsupp1-data2 [file elife-95318-fig6-figsupp1-data2-v1.zip]

Sup Figure 5E

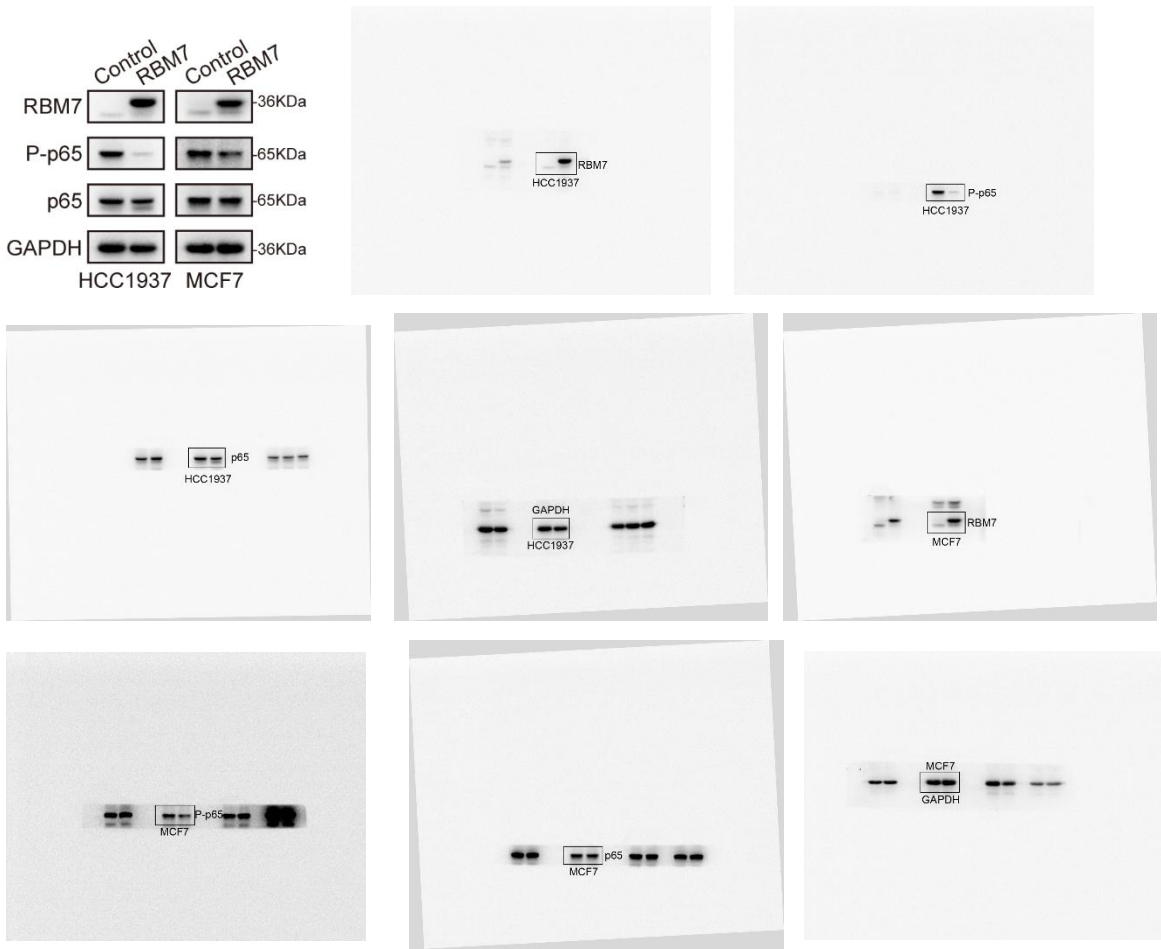

Supplement: fig6-figsupp1-data4 [file elife-95318-fig6-figsupp1-data4-v1.zip]

Sup Figure 5F

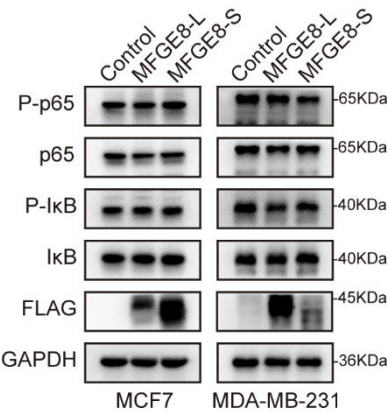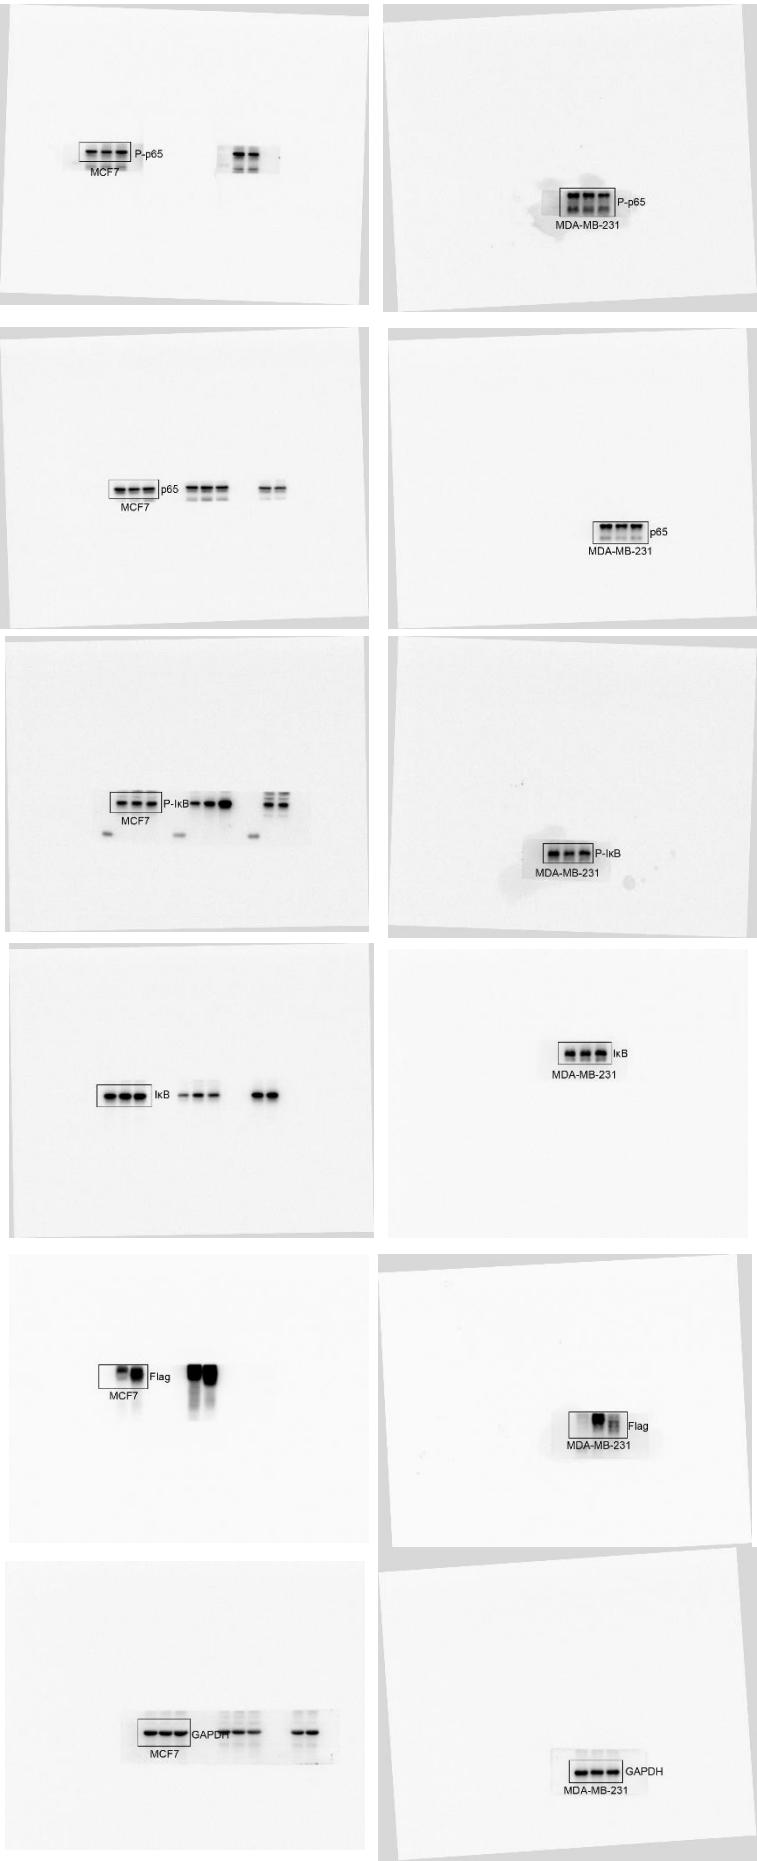

Supplement: fig6-figsupp1-data6 [file elife-95318-fig6-figsupp1-data6-v1.zip]

**Sup Figure 6B**

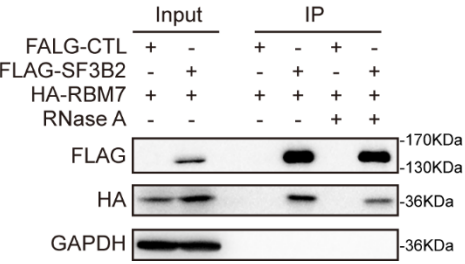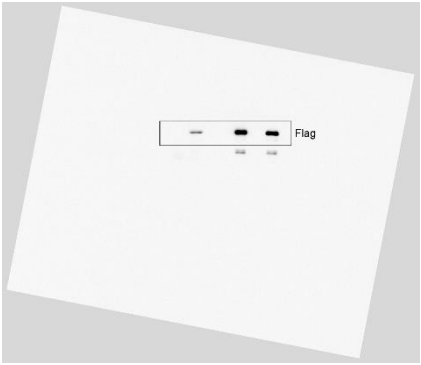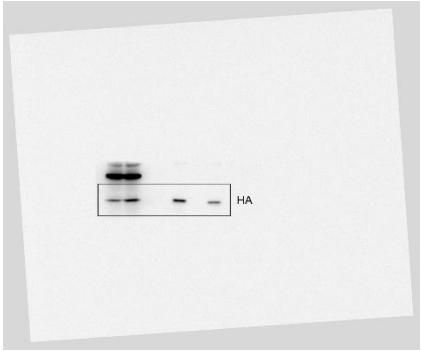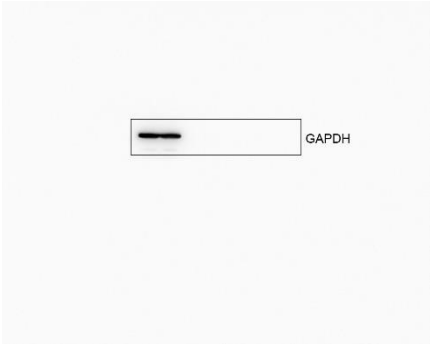

Supplement: fig7-figsupp1-data2 [file elife-95318-fig7-figsupp1-data2-v1.zip]

## Sup Figure 6C

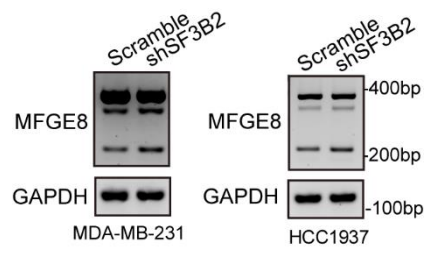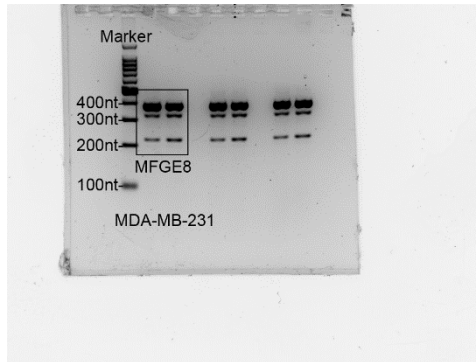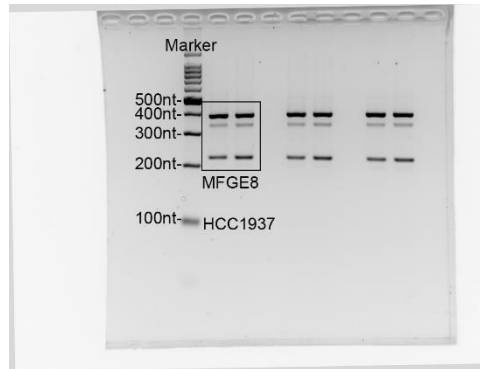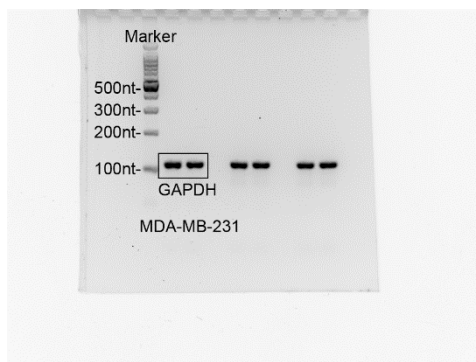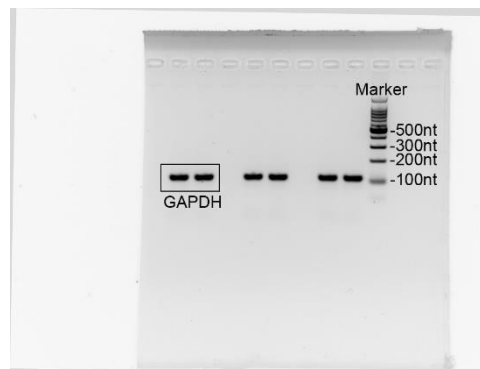

Supplement: fig7-figsupp1-data4 [file elife-95318-fig7-figsupp1-data4-v1.zip]
